# Supplementary material for: The Landscape of Lipid Metabolism in Lung Cancer: The Role of Structural Profiling
Source: MDPI journal article supplement (doi:10.3390/jcm12051736), 2023-02-21
Supplement: s1 [file s1]

## Certificate of Analysis

### Product Identification

Name: Internal Standards Kit for Lipidyzer™ Platform

Part number: 5040156

Lot number: LPISTDKIT-100

Manufacture date: 15 DEC 2015

Expiration date: 15 DEC 2016

| Part Number / Lot Number | Internal Standards                                                       | MW     | Specified Concentration mg/ml | Actual Concentration +/-10% | Purity % |
|--------------------------|--------------------------------------------------------------------------|--------|-------------------------------|-----------------------------|----------|
| 5040146<br>CERISTLPV-100 | Ceramides (CER) Internal Standards for Lipidyzer™ Platform               |        | 0.02                          | 0.02                        | 100%     |
|                          | dCER(d16:0)                                                              | 546.97 | 0.02                          | 0.02                        |          |
| 5040147<br>CHEISTLPV-100 | Cholesterol Ester (CE) Internal Standards for Lipidyzer™ Platform        |        | 3.0                           | 3.0                         | 100%     |
|                          | dCE(16:0)                                                                | 631.62 | 0.15                          | 0.13                        |          |
|                          | dCE(16:1)                                                                | 629.61 | 0.15                          | 0.13                        |          |
|                          | dCE(18:1)                                                                | 657.64 | 0.60                          | 0.57                        |          |
|                          | dCE(18:2)                                                                | 655.62 | 1.50                          | 1.43                        |          |
|                          | dCE(20:3)                                                                | 681.64 | 0.15                          | 0.15                        |          |
|                          | dCE(20:4)                                                                | 679.62 | 0.15                          | 0.18                        |          |
|                          | dCE(20:5)                                                                | 677.61 | 0.15                          | 0.18                        |          |
|                          | dCE(22:6)                                                                | 703.62 | 0.15                          | 0.22                        |          |
| 5040148<br>DAGISTLPV-100 | Diacylglycerol (DAG) Internal Standards for Lipidyzer™ Platform          |        | 0.025                         | 0.025                       | 100%     |
|                          | dDAG(16:0/16:0)                                                          | 577.56 | 0.005                         | 0.004                       |          |
|                          | dDAG(16:0/18:0)                                                          | 605.59 | 0.005                         | 0.005                       |          |
|                          | dDAG(16:0/18:1)                                                          | 603.57 | 0.005                         | 0.006                       |          |
|                          | dDAG(16:0/18:2)                                                          | 601.56 | 0.005                         | 0.005                       |          |
|                          | dDAG(16:0/18:3)                                                          | 599.54 | 0.00125                       | 0.00135                     |          |
|                          | dDAG(16:0/20:4)                                                          | 625.56 | 0.00125                       | 0.00150                     |          |
|                          | dDAG(16:0/20:5)                                                          | 623.54 | 0.00125                       | 0.00145                     |          |
|                          | dDAG(16:0/22:6)                                                          | 649.56 | 0.00125                       | 0.00160                     |          |
| 5040149<br>FFAISTLPV-100 | Free Fatty Acids (FFA) Internal Standards for Lipidyzer™ Platform        |        | 0.10                          | 0.10                        | 100%     |
|                          | dFFA(16:0)                                                               | 265.48 | 0.05                          | 0.05                        |          |
|                          | dFFA(17:1)                                                               | 268.48 | 0.05                          | 0.05                        |          |
| 5040150<br>LPCISTLPV-100 | Lysophosphatidylcholine (LPC) Internal Standards for Lipidyzer™ Platform |        | 0.10                          | 0.10                        | 99.1%    |
|                          | dLPC(16:0)                                                               | 504.69 | 0.10                          | 0.10                        |          |

## Certificate of Analysis

| Part Number / Lot Number | Internal Standards                                                            | MW     | Specified Concentration mg/ml | Actual Concentration +/-10% | Purity % |
|--------------------------|-------------------------------------------------------------------------------|--------|-------------------------------|-----------------------------|----------|
| 5040151<br>LPEISTLPV-100 | Lysophosphatidylethanolamine (LPE) Internal Standards for Lipidyzer™ Platform |        | 0.05                          | 0.05                        | 100%     |
|                          | dLPE(18:0)                                                                    | 486.64 | 0.05                          | 0.05                        |          |
| 5040152<br>PCISTLPV-100  | Phosphatidylcholine (PC) Internal Standards for Lipidyzer™ Platform           |        | 1.25                          | 1.25                        | 100%     |
|                          | dPC(16:0/16:1)                                                                | 740.60 | 0.0625                        | 0.0575                      |          |
|                          | dPC(16:0/18:1)                                                                | 768.63 | 0.2500                        | 0.2525                      |          |
|                          | dPC(16:0/18:2)                                                                | 766.62 | 0.2500                        | 0.2550                      |          |
|                          | dPC(16:0/18:3)                                                                | 764.60 | 0.0625                        | 0.0650                      |          |
|                          | dPC(16:0/20:3)                                                                | 792.63 | 0.0625                        | 0.0725                      |          |
|                          | dPC(16:0/20:4)                                                                | 790.62 | 0.2500                        | 0.2775                      |          |
|                          | dPC(16:0/20:5)                                                                | 788.60 | 0.0625                        | 0.0700                      |          |
|                          | dPC(16:0/22:4)                                                                | 818.65 | 0.0625                        | 0.0750                      |          |
|                          | dPC(16:0/22:5)                                                                | 816.63 | 0.0625                        | 0.0775                      |          |
|                          | dPC(16:0/22:6)                                                                | 814.62 | 0.1250                        | 0.1450                      |          |
| 5040153<br>PEISTLPV-100  | Phosphatidylethanolamine (PE) Internal Standards for Lipidyzer™ Platform      |        | 0.05                          | 0.05                        | 100%     |
|                          | dPE(18:0/18:1)                                                                | 750.59 | 0.01                          | 0.01                        |          |
|                          | dPE(18:0/18:2)                                                                | 748.58 | 0.01                          | 0.01                        |          |
|                          | dPE(18:0/18:3)                                                                | 746.56 | 0.0025                        | 0.0021                      |          |
|                          | dPE(18:0/20:3)                                                                | 774.59 | 0.0025                        | 0.0027                      |          |
|                          | dPE(18:0/20:4)                                                                | 772.58 | 0.01                          | 0.01                        |          |
|                          | dPE(18:0/20:5)                                                                | 770.56 | 0.0025                        | 0.0022                      |          |
|                          | dPE(18:0/22:5)                                                                | 798.60 | 0.0025                        | 0.0024                      |          |
|                          | dPE(18:0/22:6)                                                                | 796.58 | 0.01                          | 0.01                        |          |
| 5040154<br>SMISTLPV-100  | Sphingomyelin (SM) Internal Standards for Lipidyzer™ Platform                 |        | 0.4                           | 0.4                         | 100%     |
|                          | dSM(16:0)                                                                     | 709.61 | 0.1                           | 0.1                         |          |
|                          | dSM(18:1)                                                                     | 735.62 | 0.1                           | 0.1                         |          |
|                          | dSM(24:0)                                                                     | 821.73 | 0.1                           | 0.1                         |          |
|                          | dSM(24:1)                                                                     | 819.72 | 0.1                           | 0.1                         |          |

## Certificate of Analysis

| Part Number / Lot Number | Internal Standards                                                 | MW     | Specified Concentration mg/ml | Actual Concentration +/-10% | Purity % |
|--------------------------|--------------------------------------------------------------------|--------|-------------------------------|-----------------------------|----------|
| 5040155<br>TAGISTLPV-100 | Triacylglycerol (TAG) Internal Standards for Lipidyzer™ Platform   |        | 0.70                          | 0.70                        | 100%     |
|                          | dTAG50:1-FA16:0                                                    | 841.81 | 0.14                          | 0.13                        |          |
|                          | dTAG52:1-FA18:0                                                    | 869.84 | 0.14                          | 0.14                        |          |
|                          | dTAG52:2-FA18:1                                                    | 867.82 | 0.14                          | 0.14                        |          |
|                          | dTAG52:3-FA18:2                                                    | 865.80 | 0.14                          | 0.14                        |          |
|                          | dTAG52:4-FA18:3                                                    | 863.79 | 0.035                         | 0.040                       |          |
|                          | dTAG54:4-FA20:3                                                    | 891.82 | 0.035                         | 0.040                       |          |
|                          | dTAG54:5-FA20:4                                                    | 889.80 | 0.035                         | 0.040                       |          |
|                          | dTAG56:7-FA22:6                                                    | 913.80 | 0.035                         | 0.038                       |          |
| 5040387<br>DCERISLPV-100 | Dihydroceramides (DCER) Internal Standards for Lipidyzer™ Platform |        | 0.004                         | 0.004                       | 100%     |
|                          | dDCER(16:0)                                                        | 548.99 | 0.004                         | 0.004                       |          |
| 5040388<br>HCERISLPV-100 | Hexosylceramides (HCER) Internal Standards for Lipidyzer™ Platform |        | 0.03                          | 0.03                        | 100%     |
|                          | dHCER(16:0)                                                        | 709.11 | 0.03                          | 0.03                        |          |
| 5040389<br>LCERISLPV-100 | Lactosylceramide (LCER) Internal Standards for Lipidyzer™ Platform |        | 0.03                          | 0.03                        | 100%     |
|                          | dLCER(16:0)                                                        | 871.25 | 0.03                          | 0.03                        |          |

### Quality Assurance Statement:

These standards have been manufactured using ISO9001 procedures. Concentrations are calculated gravimetrically, and balances are calibrated to NIST traceable standards in accordance with our ISO procedures. Purity from interferences is verified through mass spectrometric analysis. Solvents are minimum HPLC grade.

The information on this certificate has been reviewed and accurately reflects manufacturing and analysis data for the product lot specified.

Quality Assurance Associate: LC

Date: 29 DEC 2015

### Support

Technical Support call 1 800-952-4716 or 877-740-2129 or E-mail: [Support@sciex.com](mailto:Support@sciex.com)

This certificate may be obtained at: <http://sciex.com>
