# Supplementary material for: The Landscape of Lipid Metabolism in Lung Cancer: The Role of Structural Profiling
Source: MDPI journal article supplement (doi:10.3390/jcm12051736), 2023-02-21
Supplement: s1 [file s1]

***Supplementary Material-Table***

**List**

1. Supplement Table S1 HPLC-MS/MS parameters
2. Supplement Table S2 The parameters of the ESI source condition in positive and negative ion mode

**Table S1.** HPLC-MS/MS parameters

|                    |                                                                              |
|--------------------|------------------------------------------------------------------------------|
| Instrument         | Sciex QTRAP 4500 with HPLC system                                            |
| mobile phases A    | 95% ACN (working liquid) and mass spectrometry water (column washing liquid) |
| mobile phases B    | 50% ACN water (working liquid) and 100% ACN (washing column liquid)          |
| Total flow rate    | 0.5 mL/min                                                                   |
| Column             | 100 mm× 2.1 mm, 1.7μm                                                        |
| Column temperature | 35°C                                                                         |
| Gradient elution B | 0min, 0.1%B; 10 min, 20% B; 11-13min, 98% B; 13.1 min, 0.1% B; 16min, stop.  |

**Table S2.** The parameters of the ESI source condition in positive and negative ion mode

| parameters                    | pos    | neg     |
|-------------------------------|--------|---------|
| IonSpray Voltage              | 5500 V | -4500 V |
| Curtain Gas                   | 35 psi | 35 psi  |
| Collision Gas                 | Medium | Medium  |
| Ion Source Gas 1              | 55 psi | 55 psi  |
| Ion Source Gas 2              | 55 psi | 55 psi  |
| Temperature (TEM)             | 350°C  | 350°C   |
| Declustering Potential        | 80 V   | -80 V   |
| Entrance Potential            | 10 V   | -10 V   |
| Collision Cell Exit Potential | 10 V   | -10 V   |
