# Supplementary material for: The Landscape of Lipid Metabolism in Lung Cancer: The Role of Structural Profiling
Source: MDPI journal article supplement (doi:10.3390/jcm12051736), 2023-02-21
Supplement: s1 [file s1]

## List

1. **Supplement Figure S1.** Representative chromatograms of QC by lipidomics analyses in positive (A) and negative (B) modes.
2. **Supplement Figure S2.** Representative chromatograms of case group by lipidomics analyses in positive (A) and negative (B) modes.
3. **Supplement Figure S3.** Representative chromatograms of control group by lipidomics analyses in positive (A) and negative (B) modes.
4. **Supplement Figure S4.** Lipid species identified by lipidomics.
  - (A) PCA score plot of NEG
  - (B) PCA score plot of POS
  - (C) Identification of lipid categories and counts.
  - (D) volcano plot
5. **Supplement Figure S5.** The association between 20 lipid subclasses and risk of LC
6. **Supplement Figure S6.** Multivariate analysis screening and comparison.
  - (A) OPLS-DA score plot of neg.
  - (B) OPLS-DA score plot of pos.
  - (C) Validation of OPLS-DA neg by permutation test performed with 1000 random permutations test.
  - (D) Validation of OPLS-DA pos by permutation test performed with 1000 random permutations test.
  - (E) sPLS-DA score plot of NEG.
  - (F) sPLS-DA score plot of POS.
  - (G) Plot of the performance of the sPLS-DA model(neg)
  - (H) Plot of the performance of the sPLS-DA model(pos).
  - (I) Summary of pathway analysis by Metaboanalyst online.
7. **Supplement Figure S7.** The association between 36 differential lipids and risk of LC
8. **Supplement Figure S8.** Selection of SVM
  - (A) lipidomics metabolic biomarkers of SVM classification.
  - (B) Plot of the predictive accuracy of biomarker models (SVM)
9. **Supplement Figure S9.** levels of LS in the LC and control group
  - (A) Box plot.
  - (B) ROC curve analysis of LS
10. **Supplement Figure S10.** Nine differential lipids between early and intermediate to advanced stage groups in association with LC.
11. **Supplement Figure S11.** Heatmap of correlation between differential lipids and blood parameters

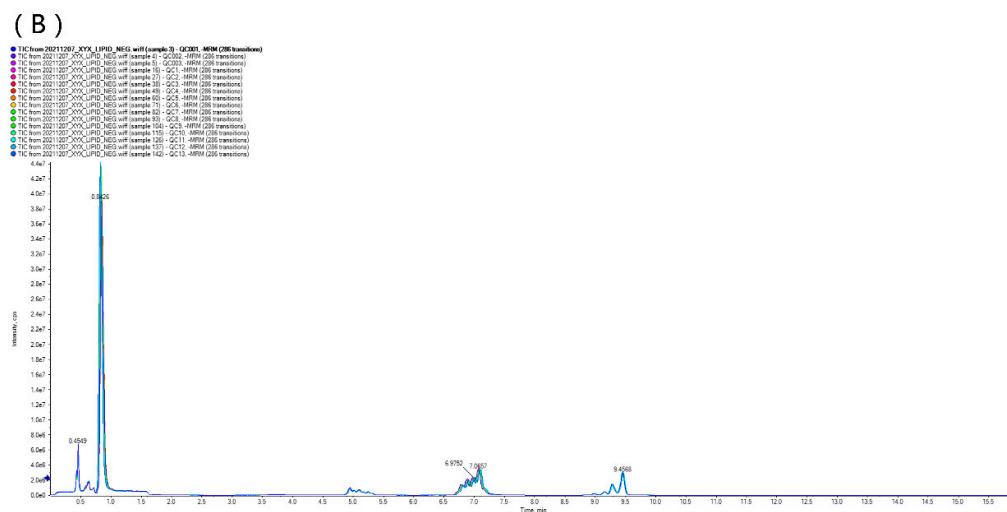

**Supplement Figure S1.** Representative chromatograms of QC by lipidomics analyses in positive (A) and negative (B) modes.

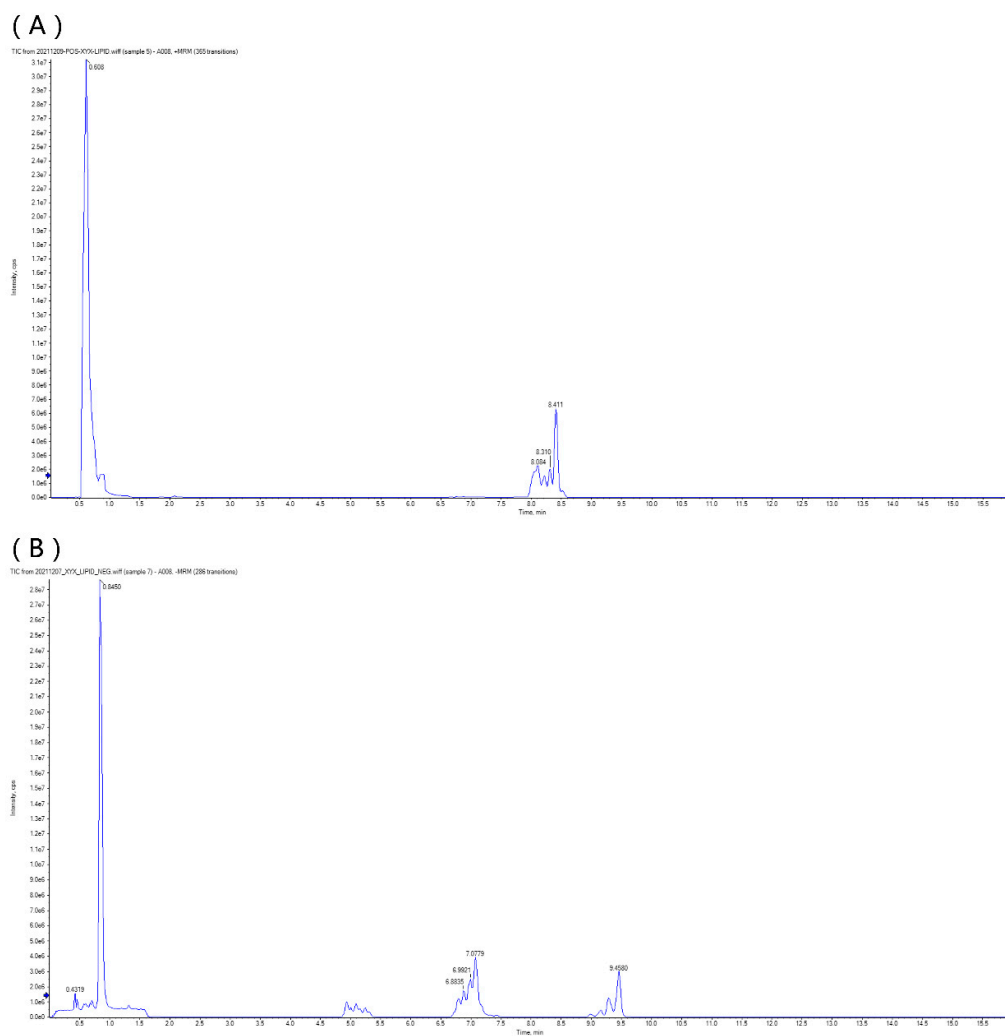

**Supplement Figure S2.** Representative chromatograms of case group by lipidomics analyses in positive (A) and negative (B) modes.

(A)

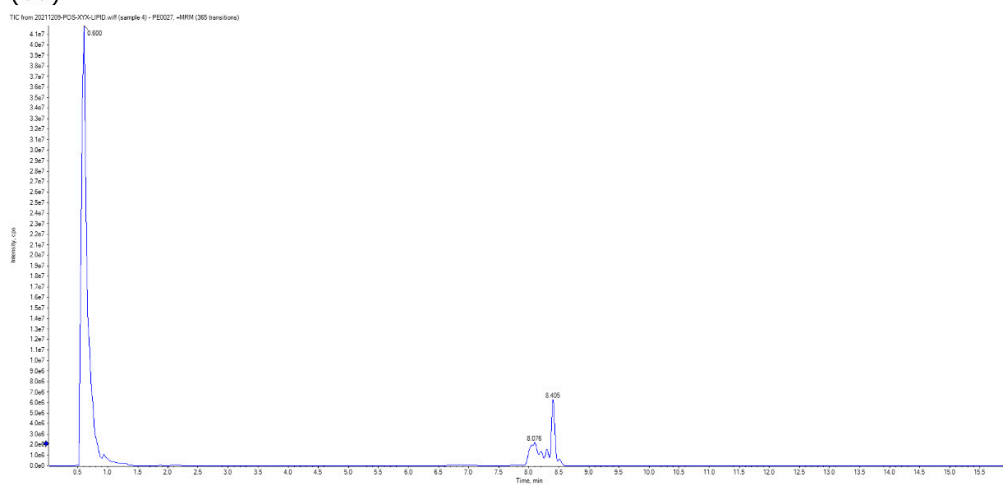

(B)

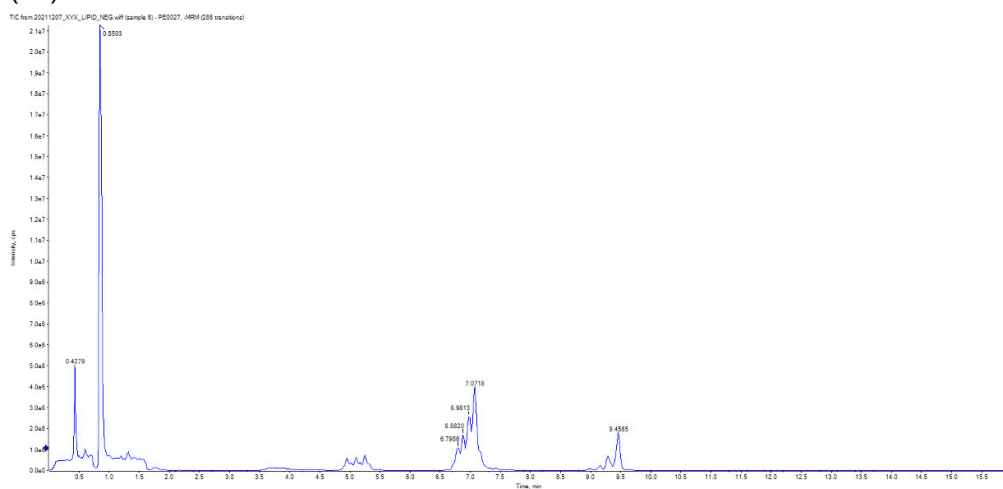

**Supplement Figure S3.** Representative chromatograms of control group by lipidomics analyses in positive (A) and negative (B) modes.

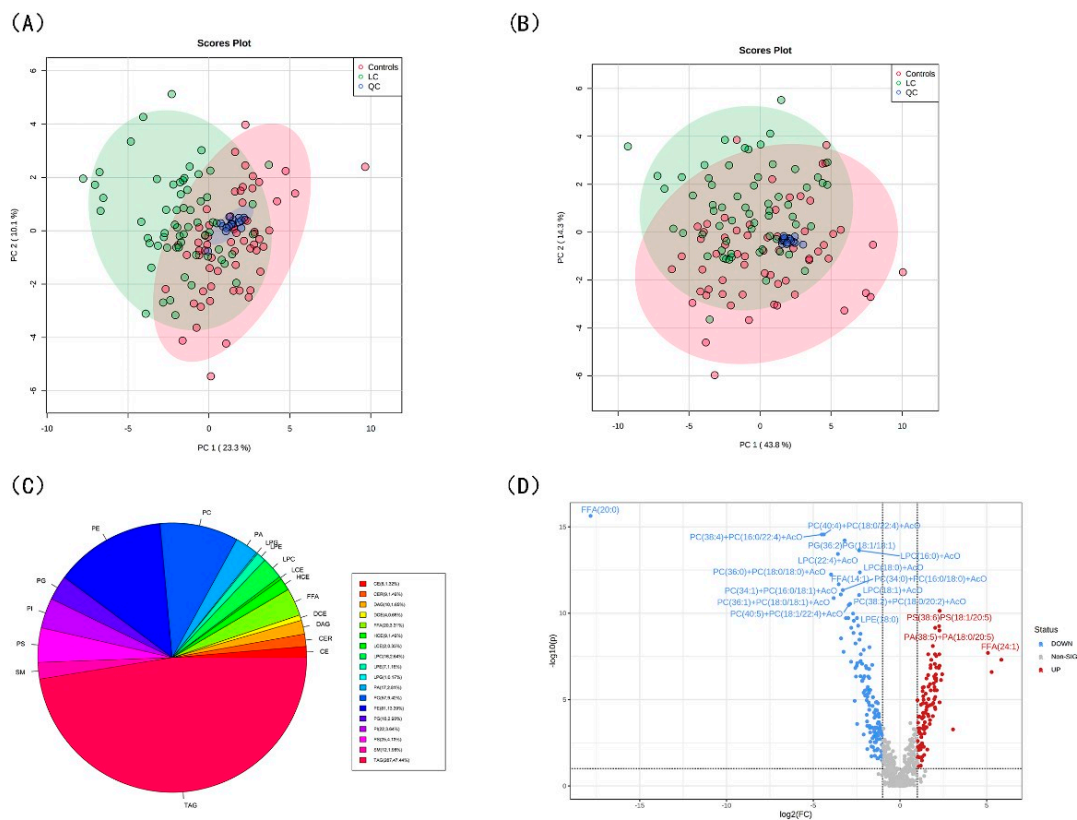

**Supplement Figure S4.** Lipid species identified by lipidomics.

(A) PCA score plot of NEG (B) PCA score plot of POS (C) Identification of lipid categories and counts. (D) volcano plot

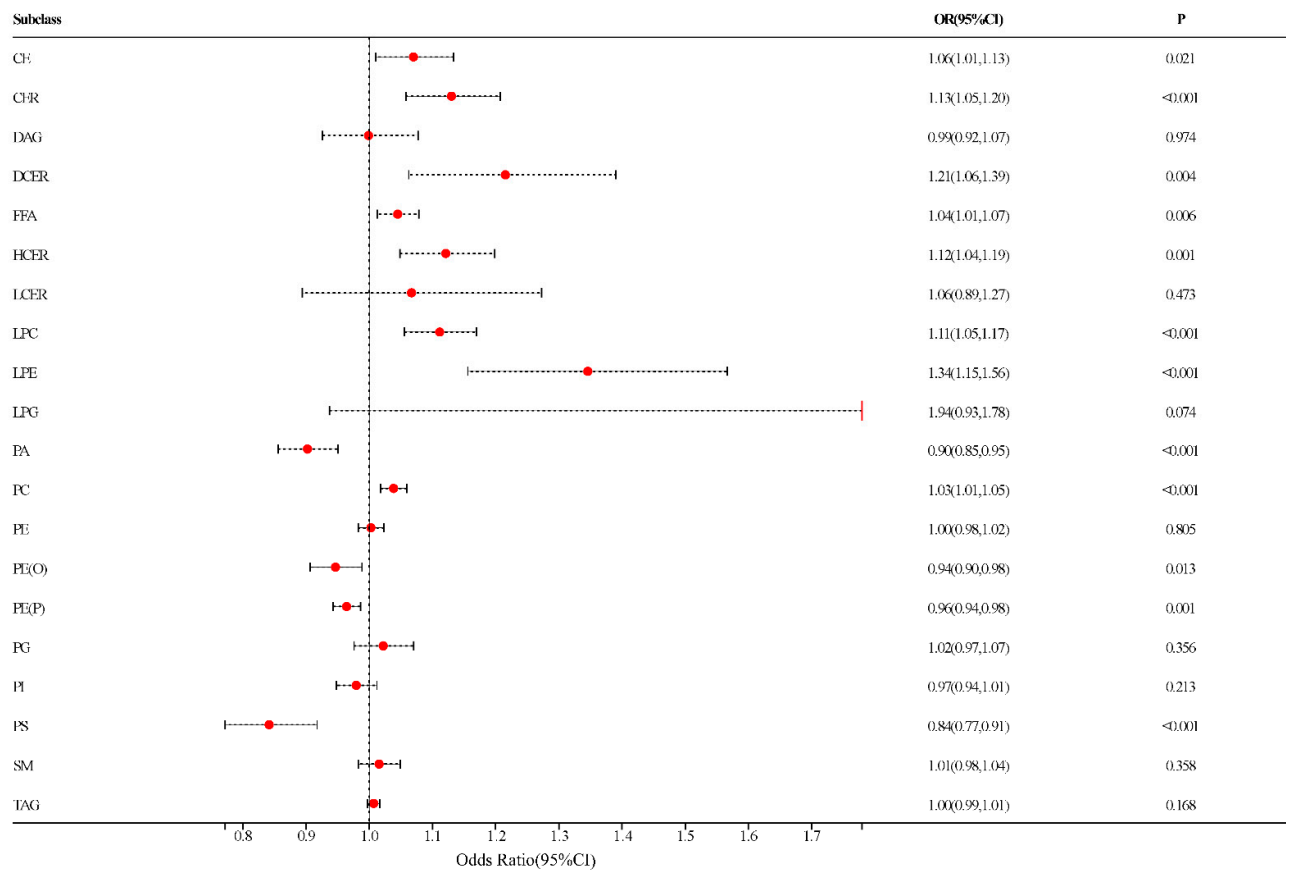

**Supplement Figure S5.** The association between 20 lipid subclasses and risk of LC

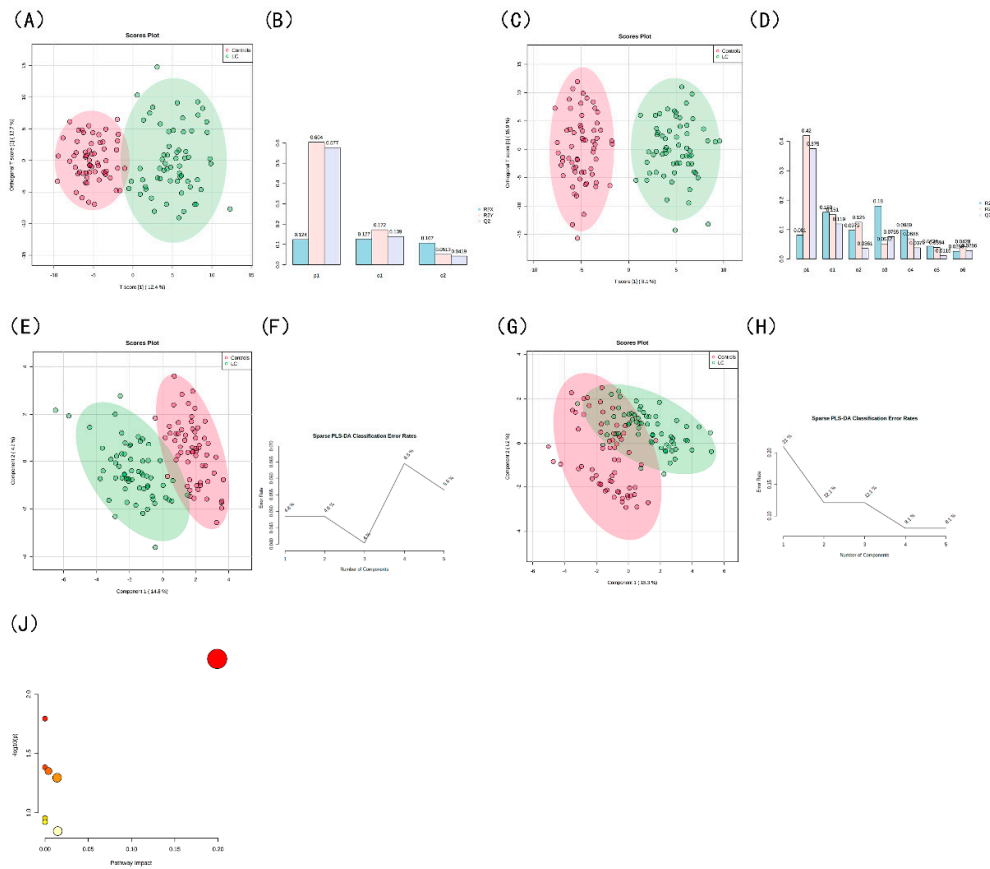

**Supplement Figure S6.** Multivariate analysis screening and comparison.

(A) OPLS-DA score plot of neg. (B) OPLS-DA score plot of pos. (C) Validation of OPLS-DA neg by permutation test performed with 1000 random permutations test. (D) Validation of OPLS-DA pos by permutation test performed with 1000 random permutations test. (E) sPLS-DA score plot of NEG. (F) sPLS-DA score plot of POS. (G) Plot of the performance of the sPLS-DA model(neg) (H) Plot of the performance of the sPLS-DA model(pos). (I) Summary of pathway analysis by Metaboanalyst online.

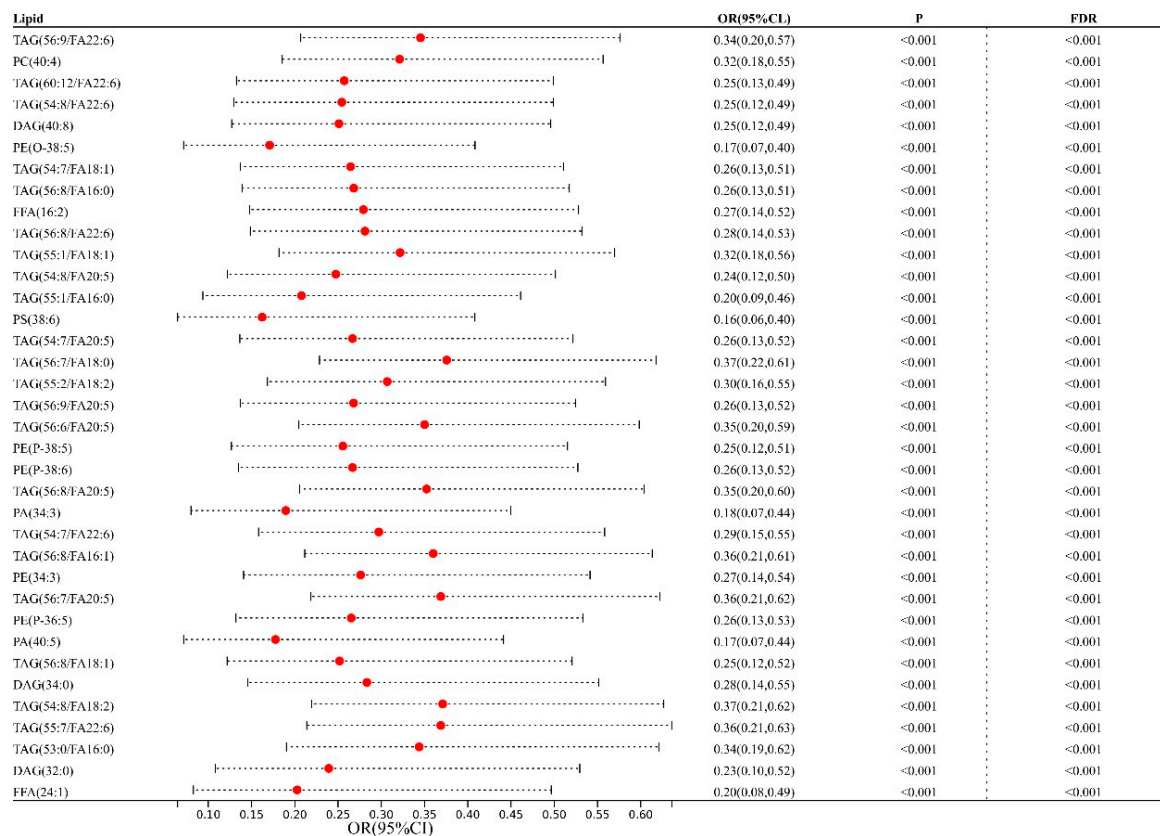

**Supplement Figure S7.** The association between 36 differential lipids and risk of LC



(A)

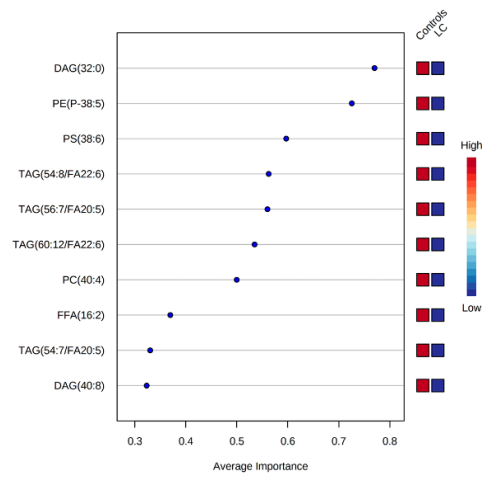

(B)

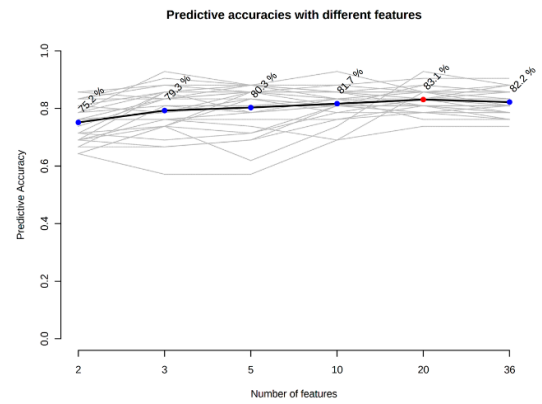

**Supplement Figure S8. Selection of SVM**

(A) lipidomics metabolic biomarkers of SVM classification. (B) Plot of the predictive accuracy of biomarker models (SVM)

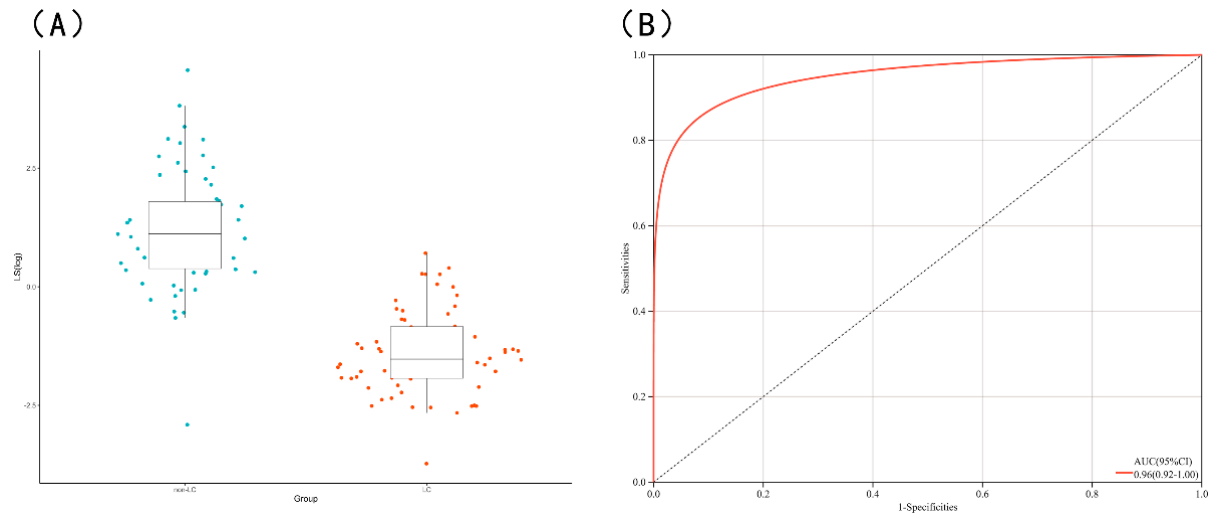

**Supplement Figure S9.** levels of LS in the LC and control group

(A) Box plot. (B) ROC curve analysis of LS

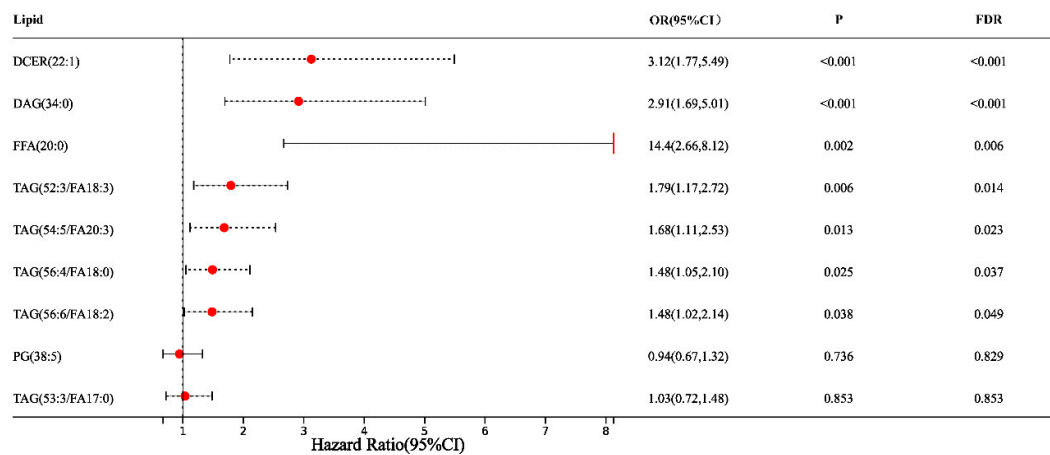

**Supplement Figure S10.** Nine differential lipids between early and intermediate to advanced stage groups in association with LC.

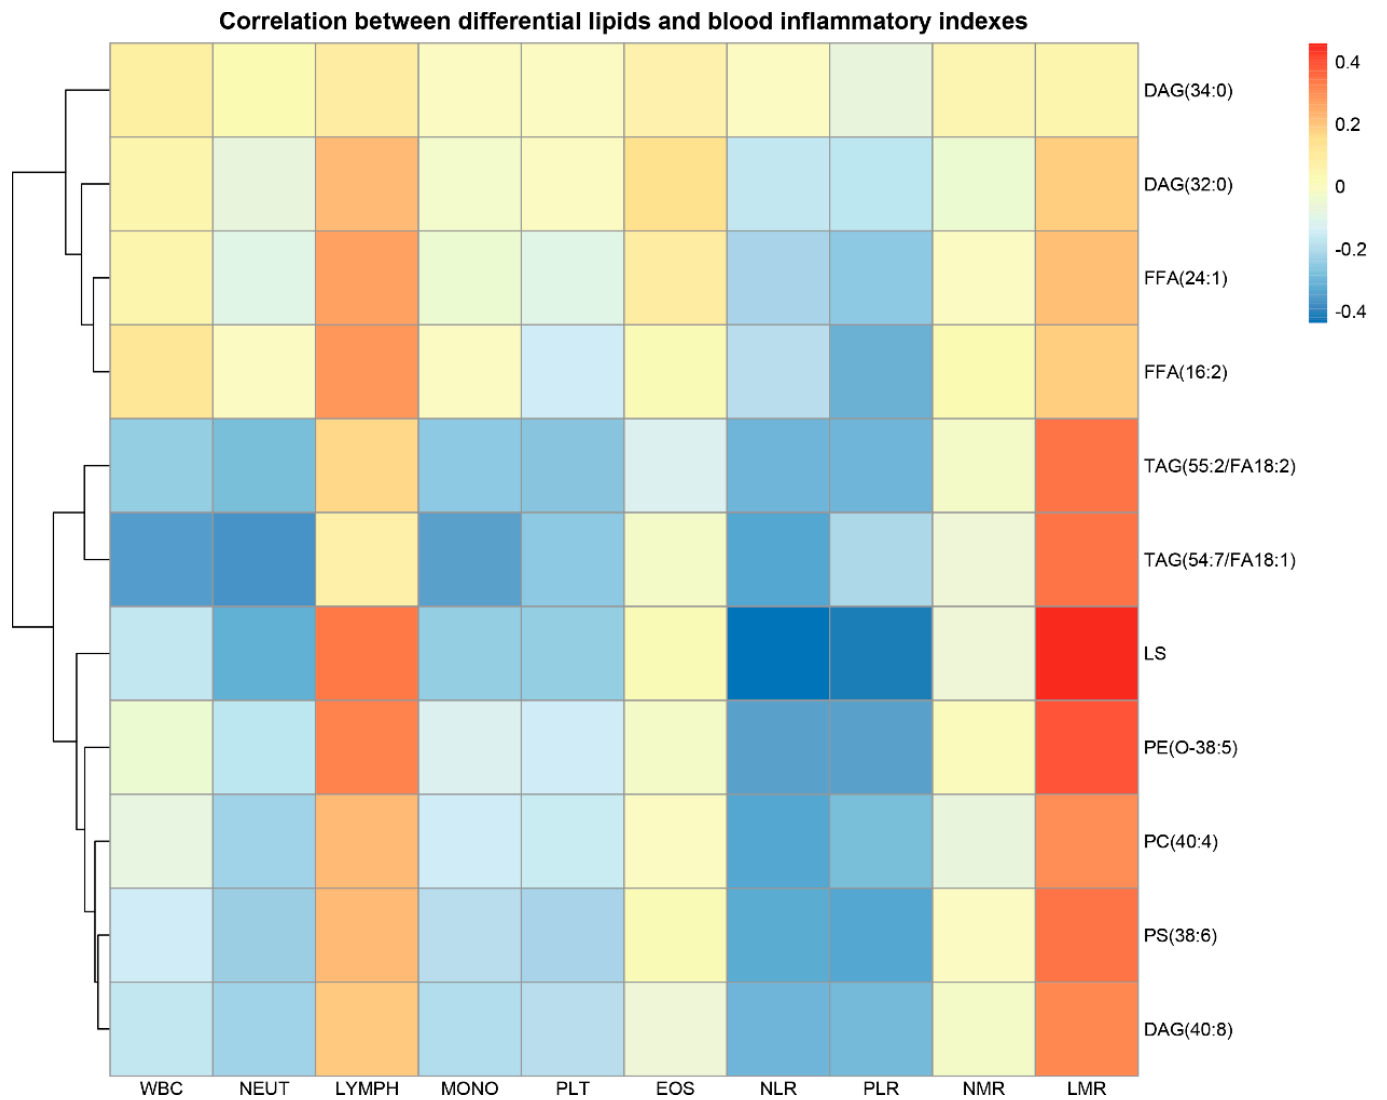

**Supplement Figure S11.** Heatmap of correlation between differential lipids and blood parameters
