# Supplementary material for: The Landscape of Lipid Metabolism in Lung Cancer: The Role of Structural Profiling
Source: J Clin Med. 2023 Feb 21;12(5):1736. doi: 10.3390/jcm12051736 (PMC10002589; doi:10.3390/jcm12051736)
Supplement: Supplementary file 1 [file jcm-12-01736-s001.zip]

Archive with 4 entries (4 files):
- 2. Supplement Tables S1 and S2.pdf
- 3. Supplement Table S3.xlsx
- 4. Supplementary Materials File S1. Internal Standards.pdf
- SupplementaryFigures.pdf
