# Supplementary material for: The Landscape of Lipid Metabolism in Lung Cancer: The Role of Structural Profiling
Source: J Clin Med. 2023 Feb 21;12(5):1736. doi: 10.3390/jcm12051736 (PMC10002589; doi:10.3390/jcm12051736)
Supplement: Supplementary file 1 [file jcm-12-01736-s001.zip › 3. Supplement Table S3.xlsx]

## Sheet: Sheet1
Sheet 1 The detailed information of lipids in positive mode.
ID	Q1 MASS(DA)	Q3 MASS(DA)	Retention time(min)	CE(volts)
SM(18:1)+H_d9_SPLASH.IS	738.663	184.2	7.64	43
SM(14:0)+H	675.5	184.1	7.91	43
SM(16:0)+H	703.6	184.1	7.82	43
SM(18:0)+H	731.6	184.1	7.7	43
SM(18:1)+H	729.6	184.1	7.73	43
SM(20:0)+H	759.6	184.1	7.61	43
SM(20:1)+H	757.6	184.1	7.61	43
SM(22:0)+H	787.7	184.1	7.5	43
SM(22:1)+H	785.7	184.1	7.5	43
SM(24:0)+H	815.7	184.1	7.4	43
SM(24:1)+H	813.7	184.1	7.43	43
SM(26:0)+H	843.7	184.1	7.5	43
SM(26:1)+H	841.7	184.1	7.3	25
SM(16:0)+H_d7_Lipidyzer.IS	710.6	184.2	7.82	43
SM(18:1)+H_d7_Lipidyzer.IS	736.6	184.2	7.64	43
SM(24:0)+H_d7_Lipidyzer.IS	822.7	184.2	7.4	43
SM(24:1)+H_d7_Lipidyzer.IS	820.7	184.2	7.4	43
CE(18:1)+H_d7_Lipidyzer.IS	675.6	376.5	0.56	25
CE(18:2)+H_d7_Lipidyzer.IS	673.6	376.5	0.59	25
CE(20:3)+H_d7_Lipidyzer.IS	699.6	376.5	0.59	25
CE(20:4)+H_d7_Lipidyzer.IS	697.6	376.5	0.59	25
CE(20:5)+H_d7_Lipidyzer.IS	695.6	376.5	0.56	25
CE(22:6)+H_d7_Lipidyzer.IS	721.6	376.5	0.56	25
CE(22:6)+H	714.6	369.4	0.56	25
CE(22:5)+H	716.6	369.4	0.59	25
CE(18:1)+H	668.6	369.4	0.59	25
CE(18:2)+H	666.6	369.4	0.59	25
CE(18:3)+H	664.6	369.4	0.56	25
CE(20:3)+H	692.6	369.4	0.59	25
CE(20:4)+H	690.6	369.4	0.59	25
CE(20:5)+H	688.6	369.4	0.56	25
CER(16:0)+H_d_Lipidyzer.IS	547.6	264.4	0.62	43
CER(16:0)+H	538.6	264.4	0.62	43
CER(18:0)+H	566.7	264.4	0.59	43
CER(20:0)+H	594.6	264.4	0.59	43
CER(22:0)+H	622.7	264.4	0.59	43
CER(22:1)+H	620.7	264.4	0.59	43
CER(24:0)+H	650.8	264.4	0.59	43
CER(24:1)+H	648.8	264.4	0.59	43
CER(26:0)+H	678.9	264.4	0.59	43
CER(26:1)+H	676.9	264.4	0.59	43
DCER(16:0)+H_d_Lipidyzer.IS	549.6	266.4	0.59	43
DCER(22:0)+H	624.8	266.4	0.59	43
DCER(22:1)+H	620.4	266.4	0.62	43
DCER(24:0)+H	652.9	266.4	0.59	43
DCER(24:1)+H	650.9	266.4	0.59	43
HCER(16:0)+H_d9_Lipidyzer.IS	709.7	264.4	0.83	43
HCER(16:0)+H	700.7	264.4	0.83	43
HCER(18:0)+H	728.8	264.4	0.8	43
HCER(20:0)+H	756.7	264.4	0.8	43
HCER(22:0)+H	784.9	264.4	0.8	43
HCER(24:0)+H	812.9	264.4	0.77	43
HCER(24:1)+H	810.9	264.4	0.77	43
HCER(d18:0/18:0)+H	871.9	264.4	1.81	43
HCER(d18:0/20:0)+H	834.9	264.4	1.84	43
HCER(d18:0/22:0)+H	862.9	264.4	1.81	43
LCER(16:0)+H_d9_Lipidyzer.IS	946.2	264.4	1.66	43
LCER(16:0)+H	974.8	264.4	1.63	43
LCER(18:0)+H	972.9	264.4	1.63	43
TAG(50:1/FA16:0)+NH4d9_Lipidyzer.IS	859.8	586.6	0.59	38
TAG(52:1/FA18:0)+NH4d9_Lipidyzer.IS	887.8	586.5	0.59	38
TAG(52:2/FA18:1)+NH4d9_Lipidyzer.IS	885.8	586.6	0.59	38
TAG(52:3/FA18:2)+NH4d9_Lipidyzer.IS	883.8	586.6	0.59	38
TAG(52:4/FA18:3)+NH4d9_Lipidyzer.IS	881.8	586.6	0.54	38
TAG(54:4/FA20:3)+NH4d9_Lipidyzer.IS	909.8	586.6	0.59	38
TAG(54:5/FA20:4)+NH4d9_Lipidyzer.IS	907.8	586.6	0.54	38
TAG(56:7/FA22:6)+NH4d9_Lipidyzer.IS	931.9	586.7	0.54	38
TAG(44:0/FA16:0)+NH4	768.708	495.441	0.54	38
TAG(44:1/FA16:0)+NH4	766.692	493.425	0.54	38
TAG(44:1/FA18:1)+NH4	766.692	467.409	0.54	38
TAG(44:2/FA16:0)+NH4	764.676	491.409	0.54	38
TAG(46:0/FA14:0)+NH4	796.7	551.503	0.56	38
TAG(46:0/FA16:0)+NH4	796.7	523.472	0.59	38
TAG(46:1/FA14:0)+NH4	794.7	549.5	0.54	38
TAG(46:1/FA16:0)+NH4	794.7	521.4	0.56	38
TAG(46:1/FA16:1)+NH4	794.7	523.472	0.54	38
TAG(46:1/FA18:1)+NH4	794.7	495.441	0.54	38
TAG(46:2/FA14:0)+NH4	792.7	547.5	0.54	38
TAG(46:2/FA16:0)+NH4	792.7	519.441	0.54	38
TAG(46:2/FA18:1)+NH4	792.7	493.425	0.54	38
TAG(46:2/FA18:2)+NH4	792.7	495.441	0.54	38
TAG(46:3/FA18:2)+NH4	790.7	493.425	0.54	38
TAG(48:0/FA14:0)+NH4	824.7	579.5	0.59	38
TAG(48:0/FA16:0)+NH4	824.7	551.4	0.59	38
TAG(48:0/FA18:0)+NH4	824.7	523.472	0.56	38
TAG(48:1/FA14:0)+NH4	822.7	577.5	0.56	38
TAG(48:1/FA16:0)+NH4	822.7	549.4	0.54	38
TAG(48:1/FA16:1)+NH4	822.7	551.4	0.56	38
TAG(48:1/FA18:1)+NH4	822.7	523.472	0.56	38
TAG(48:2/FA14:0)+NH4	820.7	575.5	0.54	38
TAG(48:2/FA16:0)+NH4	820.7	547.4	0.54	38
TAG(48:2/FA16:1)+NH4	820.7	549.4	0.54	38
TAG(48:2/FA18:1)+NH4	820.7	521.4	0.54	38
TAG(48:2/FA18:2)+NH4	820.7	523.472	0.54	38
TAG(48:3/FA14:0)+NH4	818.7	573.5	0.54	38
TAG(48:3/FA16:0)+NH4	818.7	545.4	0.54	38
TAG(48:3/FA16:1)+NH4	818.7	547.4	0.54	38
TAG(48:3/FA18:1)+NH4	818.7	519.441	0.54	38
TAG(48:3/FA18:2)+NH4	818.7	521.4	0.54	38
TAG(48:4/FA18:2)+NH4	816.7	519.441	0.54	38
TAG(49:0/FA16:0)+NH4	838.8	565.5	0.68	38
TAG(49:1/FA16:0)+NH4	836.8	563.5	0.59	38
TAG(49:1/FA18:1)+NH4	836.8	537.5	0.56	38
TAG(49:2/FA16:0)+NH4	834.8	561.5	0.56	38
TAG(49:2/FA18:2)+NH4	834.8	537.5	0.54	38
TAG(50:0/FA16:0)+NH4	852.8	579.5	0.59	38
TAG(50:0/FA18:0)+NH4	852.8	551.503	0.68	38
TAG(50:1/FA14:0)+NH4	850.8	605.6	0.56	38
TAG(50:1/FA16:0)+NH4	850.8	577.5	0.59	38
TAG(50:1/FA16:1)+NH4	850.8	579.5	0.56	38
TAG(50:1/FA18:0)+NH4	850.8	549.5	0.56	38
TAG(50:1/FA18:1)+NH4	850.8	551.503	0.56	38
TAG(50:2/FA14:0)+NH4	848.8	603.6	0.56	38
TAG(50:2/FA16:0)+NH4	848.8	575.5	0.56	38
TAG(50:2/FA16:1)+NH4	848.8	577.5	0.56	38
TAG(50:2/FA18:0)+NH4	848.8	547.5	0.54	38
TAG(50:2/FA18:1)+NH4	848.8	549.5	0.56	38
TAG(50:2/FA18:2)+NH4	848.8	551.503	0.56	38
TAG(50:3/FA14:0)+NH4	846.8	601.6	0.54	38
TAG(50:3/FA16:0)+NH4	846.8	573.5	0.54	38
TAG(50:3/FA16:1)+NH4	846.8	575.5	0.54	38
TAG(50:3/FA18:1)+NH4	846.8	547.5	0.54	38
TAG(50:3/FA18:2)+NH4	846.8	549.5	0.54	38
TAG(50:3/FA18:3)+NH4	846.8	551.503	0.56	38
TAG(50:4/FA14:0)+NH4	844.6	599.4	0.54	38
TAG(50:4/FA16:0)+NH4	844.6	571.3	0.54	38
TAG(50:4/FA16:1)+NH4	844.6	573.3	0.54	38
TAG(50:4/FA18:1)+NH4	844.6	545.3	0.54	38
TAG(50:4/FA18:2)+NH4	844.6	547.3	0.54	38
TAG(50:4/FA18:3)+NH4	844.6	549.3	0.54	38
TAG(50:5/FA18:2)+NH4	842.6	545.3	0.54	38
TAG(50:5/FA18:3)+NH4	842.6	547.3	0.54	38
TAG(51:1/FA16:0)+NH4	864.8	591.5	0.56	38
TAG(51:1/FA17:0)+NH4	864.8	577.5	0.62	38
TAG(51:1/FA18:1)+NH4	864.8	565.5	0.62	38
TAG(51:2/FA16:0)+NH4	862.8	589.5	0.56	38
TAG(51:2/FA17:0)+NH4	862.8	575.5	0.56	38
TAG(51:2/FA18:1)+NH4	862.8	563.5	0.56	38
TAG(51:2/FA18:2)+NH4	862.8	565.5	0.56	38
TAG(51:3/FA18:2)+NH4	860.8	563.5	0.56	38
TAG(51:4/FA18:2)+NH4	858.8	561.5	0.54	38
TAG(52:0/FA16:0)+NH4	880.8	607.5	0.65	38
TAG(52:0/FA18:0)+NH4	880.8	579.5	0.62	38
TAG(52:1/FA16:0)+NH4	878.8	605.5	0.62	38
TAG(52:1/FA18:0)+NH4	878.8	577.5	0.56	38
TAG(52:1/FA18:1)+NH4	878.8	579.5	0.56	38
TAG(52:1/FA20:1)+NH4	878.8	551.503	0.56	38
TAG(52:2/FA16:0)+NH4	876.8	603.5	0.56	38
TAG(52:2/FA16:1)+NH4	876.8	605.5	0.56	38
TAG(52:2/FA18:0)+NH4	876.8	575.5	0.56	38
TAG(52:2/FA18:1)+NH4	876.8	577.5	0.56	38
TAG(52:2/FA18:2)+NH4	876.8	579.5	0.56	38
TAG(52:2/FA20:2)+NH4	876.8	551.503	0.56	38
TAG(52:3/FA16:0)+NH4	874.8	601.5	0.56	38
TAG(52:3/FA16:1)+NH4	874.8	603.5	0.56	38
TAG(52:3/FA18:0)+NH4	874.8	573.5	0.56	38
TAG(52:3/FA18:1)+NH4	874.8	575.5	0.56	38
TAG(52:3/FA18:2)+NH4	874.8	577.5	0.56	38
TAG(52:3/FA18:3)+NH4	874.8	579.5	0.56	38
TAG(52:3/FA20:2)+NH4	874.8	549.5	0.56	38
TAG(52:3/FA20:3)+NH4	874.8	551.503	0.56	38
TAG(52:4/FA16:0)+NH4	872.8	599.5	0.54	38
TAG(52:4/FA16:1)+NH4	872.8	601.5	0.54	38
TAG(52:4/FA18:1)+NH4	872.8	573.5	0.54	38
TAG(52:4/FA18:2)+NH4	872.8	575.5	0.54	38
TAG(52:4/FA18:3)+NH4	872.8	577.5	0.54	38
TAG(52:4/FA20:0)+NH4	872.8	543.5	0.56	38
TAG(52:4/FA20:3)+NH4	872.8	549.5	0.56	38
TAG(52:4/FA20:4)+NH4	872.8	551.503	0.56	38
TAG(52:5/FA16:0)+NH4	870.8	597.5	0.54	38
TAG(52:5/FA16:1)+NH4	870.8	599.5	0.54	38
TAG(52:5/FA18:1)+NH4	870.8	571.5	0.51	38
TAG(52:5/FA18:2)+NH4	870.8	573.5	0.51	38
TAG(52:5/FA18:3)+NH4	870.8	575.5	0.51	38
TAG(52:5/FA20:4)+NH4	870.8	549.5	0.54	38
TAG(52:5/FA20:5)+NH4	870.8	551.503	0.54	38
TAG(52:5/FA22:5)+NH4	870.8	523.472	0.54	38
TAG(52:6/FA16:0)+NH4	868.8	595.5	0.51	38
TAG(52:6/FA16:1)+NH4	868.8	597.5	0.51	38
TAG(52:6/FA18:2)+NH4	868.8	571.5	0.51	38
TAG(52:6/FA18:3)+NH4	868.8	573.5	0.51	38
TAG(52:6/FA20:4)+NH4	868.8	547.5	0.51	38
TAG(52:6/FA20:5)+NH4	868.8	549.5	0.51	38
TAG(52:6/FA22:6)+NH4	868.8	523.472	0.51	38
TAG(53:0/FA16:0)+NH4	894.8	621.5	0.56	38
TAG(53:1/FA17:0)+NH4	892.8	605.5	0.6	38
TAG(53:1/FA18:0)+NH4	892.8	591.5	0.6	38
TAG(53:1/FA18:1)+NH4	892.8	593.5	0.65	38
TAG(53:2/FA16:0)+NH4	890.8	617.5	0.6	38
TAG(53:2/FA17:0)+NH4	890.8	603.5	0.6	38
TAG(53:2/FA18:1)+NH4	890.8	591.5	0.6	38
TAG(53:2/FA18:2)+NH4	890.8	593.5	0.6	38
TAG(53:3/FA16:0)+NH4	888.8	615.5	0.56	38
TAG(53:3/FA17:0)+NH4	888.8	601.5	0.6	38
TAG(53:3/FA18:2)+NH4	888.8	591.5	0.6	38
TAG(53:4/FA17:0)+NH4	886.8	599.5	0.58	38
TAG(53:4/FA18:2)+NH4	886.8	589.5	0.56	38
TAG(54:0/FA18:0)+NH4	908.8	607.5	0.72	38
TAG(54:1/FA16:0)+NH4	906.8	633.5	0.6	38
TAG(54:1/FA18:0)+NH4	906.8	605.5	0.6	38
TAG(54:1/FA18:1)+NH4	906.8	607.5	0.72	38
TAG(54:1/FA20:0)+NH4	906.8	577.5	0.68	38
TAG(54:1/FA20:1)+NH4	906.8	579.5	0.65	38
TAG(54:2/FA16:0)+NH4	904.8	631.5	0.63	38
TAG(54:2/FA18:0)+NH4	904.8	603.5	0.6	38
TAG(54:2/FA18:1)+NH4	904.8	605.5	0.6	38
TAG(54:2/FA18:2)+NH4	904.8	607.5	0.6	38
TAG(54:2/FA20:0)+NH4	904.8	575.5	0.63	38
TAG(54:2/FA20:1)+NH4	904.8	577.5	0.65	38
TAG(54:3/FA16:0)+NH4	902.8	629.5	0.6	38
TAG(54:3/FA18:0)+NH4	902.8	601.5	0.6	38
TAG(54:3/FA18:1)+NH4	902.8	603.5	0.6	38
TAG(54:3/FA18:2)+NH4	902.8	605.5	0.6	38
TAG(54:3/FA20:1)+NH4	902.8	575.5	0.6	38
TAG(54:3/FA20:2)+NH4	902.8	577.5	0.6	38
TAG(54:3/FA20:3)+NH4	902.8	579.5	0.6	38
TAG(54:4/FA16:0)+NH4	900.8	627.5	0.58	38
TAG(54:4/FA16:1)+NH4	900.8	629.5	0.58	38
TAG(54:4/FA18:0)+NH4	900.8	599.5	0.58	38
TAG(54:4/FA18:1)+NH4	900.8	601.5	0.58	38
TAG(54:4/FA18:2)+NH4	900.8	603.5	0.58	38
TAG(54:4/FA18:3)+NH4	900.8	605.5	0.58	38
TAG(54:4/FA20:2)+NH4	900.8	575.5	0.58	38
TAG(54:4/FA20:3)+NH4	900.8	577.5	0.58	38
TAG(54:4/FA20:4)+NH4	900.8	579.5	0.58	38
TAG(54:5/FA16:0)+NH4	898.8	625.5	0.53	38
TAG(54:5/FA16:1)+NH4	898.8	627.5	0.53	38
TAG(54:5/FA18:0)+NH4	898.8	597.5	0.53	38
TAG(54:5/FA18:1)+NH4	898.8	599.5	0.53	38
TAG(54:5/FA18:2)+NH4	898.8	601.5	0.53	38
TAG(54:5/FA18:3)+NH4	898.8	603.5	0.53	38
TAG(54:5/FA20:3)+NH4	898.8	575.5	0.56	38
TAG(54:5/FA20:4)+NH4	898.8	577.5	0.58	38
TAG(54:5/FA20:5)+NH4	898.8	579.5	0.53	38
TAG(54:5/FA22:5)+NH4	898.8	551.503	0.53	38
TAG(54:6/FA16:0)+NH4	896.8	623.5	0.56	38
TAG(54:6/FA16:1)+NH4	896.8	625.5	0.53	38
TAG(54:6/FA18:1)+NH4	896.8	597.5	0.53	38
TAG(54:6/FA18:2)+NH4	896.8	599.5	0.53	38
TAG(54:6/FA18:3)+NH4	896.8	601.5	0.53	38
TAG(54:6/FA20:3)+NH4	896.8	573.5	0.56	38
TAG(54:6/FA20:4)+NH4	896.8	575.5	0.53	38
TAG(54:6/FA20:5)+NH4	896.8	577.5	0.53	38
TAG(54:6/FA22:5)+NH4	896.8	549.5	0.56	38
TAG(54:6/FA22:6)+NH4	896.8	551.503	0.56	38
TAG(54:7/FA16:1)+NH4	894.8	623.5	0.53	38
TAG(54:7/FA18:1)+NH4	894.8	595.5	0.53	38
TAG(54:7/FA18:2)+NH4	894.8	597.5	0.53	38
TAG(54:7/FA18:3)+NH4	894.8	599.5	0.53	38
TAG(54:7/FA20:4)+NH4	894.8	573.5	0.53	38
TAG(54:7/FA20:5)+NH4	894.8	575.5	0.53	38
TAG(54:7/FA22:6)+NH4	894.8	549.5	0.53	38
TAG(54:8/FA18:2)+NH4	892.8	595.5	0.53	38
TAG(54:8/FA18:3)+NH4	892.8	597.5	0.53	38
TAG(54:8/FA20:5)+NH4	892.8	573.5	0.53	38
TAG(54:8/FA22:6)+NH4	892.8	547.5	0.53	38
TAG(55:1/FA16:0)+NH4	920.9	647.6	0.53	38
TAG(55:1/FA18:1)+NH4	920.9	621.6	0.53	38
TAG(55:2/FA18:2)+NH4	918.8	621.5	0.53	38
TAG(55:3/FA18:1)+NH4	916.8	617.5	0.53	38
TAG(55:4/FA18:1)+NH4	914.8	615.5	0.53	38
TAG(55:4/FA18:2)+NH4	914.8	617.5	0.53	38
TAG(55:5/FA18:2)+NH4	912.8	615.5	0.53	38
TAG(55:7/FA22:6)+NH4	908.8	563.5	0.53	38
TAG(56:1/FA18:1)+NH4	934.9	635.6	0.7	38
TAG(56:2/FA16:0)+NH4	932.9	659.6	0.68	38
TAG(56:2/FA18:0)+NH4	932.9	631.6	0.7	38
TAG(56:2/FA20:0)+NH4	932.9	603.6	0.68	38
TAG(56:2/FA20:1)+NH4	932.9	605.6	0.72	38
TAG(56:3/FA18:0)+NH4	930.8	629.5	0.6	38
TAG(56:3/FA18:1)+NH4	930.8	631.5	0.58	38
TAG(56:3/FA18:2)+NH4	930.8	633.5	0.6	38
TAG(56:3/FA20:0)+NH4	930.8	601.5	0.65	38
TAG(56:3/FA20:1)+NH4	930.8	603.5	0.63	38
TAG(56:4/FA18:0)+NH4	928.8	627.5	0.6	38
TAG(56:4/FA18:1)+NH4	928.8	629.5	0.58	38
TAG(56:4/FA18:2)+NH4	928.8	631.5	0.58	38
TAG(56:4/FA20:1)+NH4	928.8	601.5	0.58	38
TAG(56:4/FA20:2)+NH4	928.8	603.5	0.6	38
TAG(56:4/FA20:3)+NH4	928.8	605.5	0.58	38
TAG(56:4/FA20:4)+NH4	928.8	607.5	0.58	38
TAG(56:5/FA16:0)+NH4	926.8	653.5	0.53	38
TAG(56:5/FA18:0)+NH4	926.8	625.5	0.58	38
TAG(56:5/FA18:1)+NH4	926.8	627.5	0.53	38
TAG(56:5/FA18:2)+NH4	926.8	629.5	0.53	38
TAG(56:5/FA20:1)+NH4	926.8	599.5	0.53	38
TAG(56:5/FA20:2)+NH4	926.8	601.5	0.53	38
TAG(56:5/FA20:3)+NH4	926.8	603.5	0.53	38
TAG(56:5/FA20:4)+NH4	926.8	605.5	0.58	38
TAG(56:5/FA22:4)+NH4	926.8	577.5	0.58	38
TAG(56:5/FA22:5)+NH4	926.8	579.5	0.53	38
TAG(56:6/FA16:0)+NH4	924.8	651.5	0.53	38
TAG(56:6/FA18:0)+NH4	924.8	623.5	0.53	38
TAG(56:6/FA18:1)+NH4	924.8	625.5	0.53	38
TAG(56:6/FA18:2)+NH4	924.8	627.5	0.56	38
TAG(56:6/FA20:2)+NH4	924.8	599.5	0.53	38
TAG(56:6/FA20:3)+NH4	924.8	601.5	0.53	38
TAG(56:6/FA20:4)+NH4	924.8	603.5	0.53	38
TAG(56:6/FA20:5)+NH4	924.8	605.5	0.58	38
TAG(56:6/FA22:4)+NH4	924.8	575.5	0.53	38
TAG(56:6/FA22:5)+NH4	924.8	577.5	0.53	38
TAG(56:6/FA22:6)+NH4	924.8	579.5	0.56	38
TAG(56:7/FA16:0)+NH4	922.8	649.5	0.53	38
TAG(56:7/FA18:0)+NH4	922.8	621.5	0.53	38
TAG(56:7/FA18:1)+NH4	922.8	623.5	0.53	38
TAG(56:7/FA18:2)+NH4	922.8	625.5	0.53	38
TAG(56:7/FA18:3)+NH4	922.8	627.5	0.53	38
TAG(56:7/FA20:3)+NH4	922.8	599.5	0.53	38
TAG(56:7/FA20:4)+NH4	922.8	601.5	0.53	38
TAG(56:7/FA20:5)+NH4	922.8	603.5	0.53	38
TAG(56:7/FA22:5)+NH4	922.8	575.5	0.53	38
TAG(56:7/FA22:6)+NH4	922.8	577.5	0.53	38
TAG(56:8/FA16:0)+NH4	920.8	647.5	0.53	38
TAG(56:8/FA16:1)+NH4	920.8	649.5	0.53	38
TAG(56:8/FA18:1)+NH4	920.8	621.5	0.53	38
TAG(56:8/FA18:2)+NH4	920.8	623.5	0.53	38
TAG(56:8/FA18:3)+NH4	920.8	625.5	0.53	38
TAG(56:8/FA20:4)+NH4	920.8	599.5	0.53	38
TAG(56:8/FA20:5)+NH4	920.8	601.5	0.53	38
TAG(56:8/FA22:5)+NH4	920.8	573.5	0.53	38
TAG(56:8/FA22:6)+NH4	920.8	575.5	0.53	38
TAG(56:9/FA18:3)+NH4	918.8	623.5	0.53	38
TAG(56:9/FA20:4)+NH4	918.8	597.5	0.53	38
TAG(56:9/FA20:5)+NH4	918.8	599.5	0.53	38
TAG(56:9/FA22:6)+NH4	918.8	573.5	0.53	38
TAG(57:2/FA18:1)+NH4	946.9	647.6	0.53	38
TAG(57:3/FA18:2)+NH4	944.9	647.6	0.53	38
TAG(58:10/FA18:2)+NH4	944.8	647.5	0.53	38
TAG(58:10/FA20:4)+NH4	944.8	623.5	0.53	38
TAG(58:10/FA22:6)+NH4	944.8	599.5	0.53	38
TAG(58:2/FA18:1)+NH4	960.9	661.6	0.75	38
TAG(58:3/FA18:1)+NH4	958.9	659.6	0.72	38
TAG(58:6/FA18:1)+NH4	952.8	653.5	0.53	38
TAG(58:6/FA22:4)+NH4	952.8	603.5	0.56	38
TAG(58:6/FA22:5)+NH4	952.8	605.5	0.58	38
TAG(58:7/FA18:0)+NH4	950.8	649.5	0.53	38
TAG(58:7/FA18:1)+NH4	950.8	651.5	0.53	38
TAG(58:7/FA18:2)+NH4	950.8	653.5	0.53	38
TAG(58:7/FA22:4)+NH4	950.8	601.5	0.53	38
TAG(58:7/FA22:5)+NH4	950.8	603.5	0.53	38
TAG(58:7/FA22:6)+NH4	950.8	605.5	0.53	38
TAG(58:8/FA18:1)+NH4	948.8	649.5	0.53	38
TAG(58:8/FA18:2)+NH4	948.8	651.5	0.53	38
TAG(58:8/FA20:4)+NH4	948.8	627.5	0.53	38
TAG(58:8/FA22:5)+NH4	948.8	601.5	0.53	38
TAG(58:8/FA22:6)+NH4	948.8	603.5	0.53	38
TAG(58:9/FA18:1)+NH4	946.8	647.5	0.53	38
TAG(58:9/FA18:2)+NH4	946.8	649.5	0.53	38
TAG(58:9/FA20:4)+NH4	946.8	625.5	0.53	38
TAG(58:9/FA22:5)+NH4	946.8	599.5	0.53	38
TAG(58:9/FA22:6)+NH4	946.8	601.5	0.53	38
TAG(60:10/FA22:6)+NH4	972.8	627.5	0.53	38
TAG(60:11/FA22:6)+NH4	970.8	625.5	0.53	38
TAG(60:12/FA22:6)+NH4	968.8	623.5	0.53	26
DAG(16:0/18:2)+NH4d9_Lipidyzer.IS	619.4	322.2	0.56	26
DAG(16:0/16:0)+NH4	586.5	313.3	0.56	26
DAG(16:0/18:0)+NH4	614.4	313.2	0.56	26
DAG(16:0/18:1)+NH4	612.6	313.2	0.56	26
DAG(16:0/18:2)+NH4	610.4	313.2	0.56	26
DAG(18:1/18:1)+NH4	638.4	339.3	0.56	26
DAG(18:1/18:2)+NH4	636.5	339.3	0.56	26
DAG(18:1/20:4)+NH4	660.5	339.3	0.53	26
DAG(18:2/20:4)+NH4	658.5	337.3	0.53	26
DAG(18:1/22:6)+NH4	684.6	339.3	0.53	26
DAG(18:2/22:6)+NH4	682.5	337.3	0.53	26

## Sheet: Sheet2
Sheet 2 The detailed information of lipids in negative mode.
ID	Q1 MASS(DA)	Q3 MASS(DA)	Retention time(min)	CE(volts)
PA(18:0/16:1)	673.481	253.217	5.39	-50
PA(18:0/18:1)	701.513	281.249	5.31	-50
PA(18:0/18:2)	699.497	279.233	5.34	-50
PA(18:0/20:3)	725.513	305.249	5.24	-50
PA(18:0/20:4)	723.497	303.233	5.15	-50
PA(18:0/20:5)	721.481	301.217	5.18	-50
PA(18:0/22:4)	751.528	331.264	5.15	-50
PA(18:0/22:5)	749.513	329.249	5.18	-50
PA(18:0/22:6)	747.497	327.233	5.13	-50
PA(20:0/18:1)	729.544	281.249	5.26	-50
PA(20:0/18:2)	727.528	279.233	5.26	-50
PA(20:0/20:3)	753.544	305.249	5.18	-50
PA(20:0/20:4)	751.528	303.233	5.07	-50
PA(20:0/20:5)	749.513	301.217	5.07	-50
PA(20:0/22:4)	779.56	331.264	5.1	-50
PA(20:0/22:5)	777.544	329.249	5.13	-50
PA(20:0/22:6)	775.528	327.233	5.05	-50
LPC(16:0)+AcOd9_Lipidyzer.IS	563.2	264.2	9.43	-50
LPC(14:0)+AcO	526.317	227.202	9.64	-43
LPC(16:0)+AcO	554.346	255.233	9.43	-50
LPC(16:1)+AcO	552.331	253.217	9.53	-50
LPC(18:0)+AcO	582.378	283.264	9.24	-50
LPC(18:1)+AcO	580.362	281.249	9.29	-50
LPC(18:2)+AcO	578.346	279.233	9.4	-50
LPC(18:3)+AcO	576.331	277.217	9.45	-50
LPC(20:0)+AcO	610.409	311.3	9.08	-50
LPC(20:1)+AcO	608.393	309.28	9.14	-50
LPC(20:2)+AcO	606.378	307.264	9.22	-50
LPC(20:3)+AcO	604.362	305.249	9.24	-50
LPC(20:4)+AcO	602.346	303.233	9.22	-50
LPC(20:5)+AcO	600.331	301.217	9.32	-50
LPC(22:4)+AcO	630.364	331.264	9.14	-50
LPC(22:5)+AcO	628.362	329.249	9.19	-50
LPC(22:6)+AcO	626.346	327.233	9.14	-50
PC(14:0/18:1)+AcO	790.56	281.249	7.16	-50
PC(14:0/18:2)+AcO	788.545	279.233	7.18	-50
PC(14:0/20:4)+AcO	812.545	303.233	6.97	-50
PC(14:0/22:6)+AcO	836.545	327.233	6.95	-50
PC(16:0/16:1)+AcOd9_Lipidyzer.IS	799.7	253.2	7.16	-50
PC(16:0/14:0)+AcO	764.545	227.202	7.26	-50
PC(16:0/16:0)+AcO	792.576	255.233	7.18	-50
PC(16:0/16:1)+AcO	790.56	253.217	7.16	-50
PC(16:0/18:1)+AcOd9_Lipidyzer.IS	827.6	281.2	7.05	-50
PC(16:0/18:0)+AcO	820.607	283.264	7.05	-50
PC(16:0/18:1)+AcO	818.592	281.249	7.08	-50
PC(16:0/18:2)+AcOd9_Lipidyzer.IS	825.6	279.2	7.1	-50
PC(16:0/18:2)+AcO	816.576	279.233	7.08	-50
PC(16:0/18:3)+AcOd9_Lipidyzer.IS	823.6	277.2	7.13	-50
PC(16:0/18:3)+AcO	814.56	277.217	7.13	-50
PC(16:0/20:3)+AcOd9_Lipidyzer.IS	851.6	305.2	6.97	-50
PC(16:0/20:1)+AcO	846.623	309.28	7.03	-50
PC(16:0/20:2)+AcO	844.607	307.264	7.05	-50
PC(16:0/20:3)+AcO	842.592	305.249	7	-50
PC(16:0/20:4)+AcOd9_Lipidyzer.IS	849.6	303.2	6.89	-50
PC(16:0/20:4)+AcO	840.576	303.233	6.89	-50
PC(16:0/20:5)+AcOd9_Lipidyzer.IS	847.6	301.2	6.92	-50
PC(16:0/20:5)+AcO	838.56	301.217	6.92	-50
PC(16:0/22:4)+AcOd9_Lipidyzer.IS	877.6	331.2	6.87	-50
PC(16:0/22:4)+AcO	868.607	331.264	6.87	-50
PC(16:0/22:5)+AcOd9_Lipidyzer.IS	875.6	329.2	6.92	-50
PC(16:0/22:5)+AcO	866.592	329.249	6.92	-50
PC(16:0/22:6)+AcOd9_Lipidyzer.IS	873.6	327.2	6.84	-50
PC(16:0/22:6)+AcO	864.576	327.233	6.84	-50
PC(16:1/18:1)+AcO	816.576	281.249	7.05	-50
PC(16:1/18:2)+AcO	814.56	253.217	7.1	-50
PC(18:0/16:1)+AcO	818.592	253.217	7.05	-50
PC(18:0/18:0)+AcO	848.639	283.264	6.97	-50
PC(18:0/18:1)+AcO	846.623	281.249	6.97	-50
PC(18:0/18:2)+AcO	844.607	279.233	7	-50
PC(18:0/18:3)+AcO	842.592	277.217	6.95	-50
PC(18:0/20:0)+AcO	876.67	283.264	6.7	-50
PC(18:0/20:1)+AcO	874.654	309.28	6.95	-50
PC(18:0/20:2)+AcO	872.639	307.264	6.95	-50
PC(18:0/20:3)+AcO	870.623	305.249	6.92	-50
PC(18:0/20:4)+AcO	868.607	303.233	6.79	-50
PC(18:0/20:5)+AcO	866.592	301.217	6.84	-50
PC(18:0/22:4)+AcO	896.639	331.264	6.79	-50
PC(18:0/22:5)+AcO	894.623	329.249	6.82	-50
PC(18:0/22:6)+AcO	892.607	327.233	6.76	-50
PC(18:1/16:1)+AcO	816.576	253.217	7.05	-50
PC(18:1/18:1)+AcO	844.607	281.249	6.95	-50
PC(18:1/18:2)+AcO	842.592	279.233	6.97	-50
PC(18:1/18:3)+AcO	840.576	277.217	6.97	-50
PC(18:1/20:1)+AcO	872.639	309.28	6.95	-50
PC(18:1/20:2)+AcO	870.623	307.264	6.95	-50
PC(18:1/20:3)+AcO	868.607	305.249	6.89	-50
PC(18:1/20:4)+AcO	866.592	303.233	6.79	-50
PC(18:1/20:5)+AcO	864.576	301.217	6.84	-50
PC(18:1/22:4)+AcO	894.623	331.264	6.79	-50
PC(18:1/22:5)+AcO	892.607	329.249	6.84	-50
PC(18:1/22:6)+AcO	890.592	327.233	6.74	-50
PC(18:2/16:1)+AcO	814.56	279.233	7.13	-50
PC(18:2/18:2)+AcO	840.576	279.233	7.03	-50
PC(18:2/18:3)+AcO	838.56	277.217	7.05	-50
PC(18:2/20:1)+AcO	870.623	309.28	6.95	-50
PC(18:2/20:2)+AcO	868.607	307.264	6.95	-50
PC(18:2/20:3)+AcO	866.592	305.249	6.92	-50
PC(18:2/20:4)+AcO	864.576	303.233	6.84	-50
PC(18:2/22:6)+AcO	888.576	327.233	6.76	-50
PC(20:0/20:4)+AcO	896.639	303.233	6.71	-50
PC(20:0/22:6)+AcO	920.639	327.233	6.68	-50
LPE(18:0)-Hd5_Lipidyzer.IS	483.33	288.3	7.3	-50
LPE(16:0)	452.278	255.233	7.45	-40
LPE(18:0)	480.31	283.264	7.32	-40
LPE(18:1)	478.293	281.249	7.34	-40
LPE(18:2)	476.278	279.233	7.42	-40
LPE(20:3)	502.294	305.249	7.29	-40
LPE(20:4)	500.278	303.233	7.26	-40
LPE(22:6)	524.278	327.233	7.21	-40
PE(16:0/16:0)	690.508	255.233	5.45	-50
PE(16:0/16:1)	688.492	253.217	5.45	-50
PE(16:0/18:1)	716.524	281.249	5.34	-50
PE(16:0/18:2)	714.508	279.233	5.37	-50
PE(16:0/20:1)	744.555	309.28	5.31	-50
PE(16:0/20:2)	742.539	307.264	5.34	-50
PE(16:0/20:3)	740.524	305.249	5.29	-50
PE(16:0/20:4)	738.508	303.233	5.21	-50
PE(16:0/20:5)	736.492	301.217	5.24	-50
PE(16:0/22:4)	766.539	331.264	5.18	-50
PE(16:0/22:5)	764.524	329.249	5.24	-50
PE(16:0/22:6)	762.508	327.233	5.16	-50
PE(18:0/18:1)-Hd5_Lipidyzer.IS	749.6	281.2	5.29	-50
PE(18:0/18:0)	746.57	283.264	5	-50
PE(18:0/18:1)	744.555	281.249	5.29	-50
PE(18:0/18:2)-Hd5_Lipidyzer.IS	747.5	279.2	5.29	-50
PE(18:0/18:2)	742.539	279.233	5.29	-50
PE(18:0/18:3)-Hd5_Lipidyzer.IS	745.5	277.2	5.31	-50
PE(18:0/18:3)	740.524	277.217	5.26	-50
PE(18:0/20:3)-Hd5_Lipidyzer.IS	773.6	305.2	5.22	-43
PE(18:0/20:1)	772.586	309.28	5.21	-50
PE(18:0/20:2)	770.57	307.264	5.29	-50
PE(18:0/20:3)	768.555	305.249	5.21	-50
PE(18:0/20:4)-Hd5_Lipidyzer.IS	771.5	303.2	5.13	-43
PE(18:0/20:4)	766.539	303.233	5.13	-50
PE(18:0/20:5)-Hd5_Lipidyzer.IS	769.5	301.2	5.16	-43
PE(18:0/20:5)	764.524	301.217	5.16	-50
PE(18:0/22:5)-Hd5_Lipidyzer.IS	797.6	329.2	5.08	-43
PE(18:0/22:4)	794.57	331.264	5.13	-50
PE(18:0/22:5)	792.555	329.249	5.16	-50
PE(18:0/22:6)-Hd5_Lipidyzer.IS	795.5	327.2	5.08	-43
PE(18:0/22:6)	790.539	327.233	5.08	-50
PE(18:1/16:1)	714.508	281.249	5.16	-50
PE(18:1/18:1)	742.539	281.249	5.26	-50
PE(18:1/18:2)	740.524	279.233	5.29	-50
PE(18:1/20:3)	766.539	305.249	5.18	-50
PE(18:1/20:4)	764.524	303.233	5.13	-50
PE(18:1/22:4)	792.555	331.264	5.1	-50
PE(18:1/22:6)	788.524	327.233	5.05	-50
PE(18:2/16:1)	712.492	279.233	5.18	-50
PE(18:2/18:2)	738.508	279.233	5.31	-50
PE(18:2/20:2)	766.539	307.264	5.26	-50
PE(18:2/20:4)	762.508	303.233	5.13	-50
PE(O-16:0/18:1)	702.544	281.249	5.37	-50
PE(O-16:0/18:2)	700.529	279.233	5.37	-50
PE(O-16:0/20:4)	724.529	303.233	5.21	-50
PE(O-16:0/20:5)	722.513	301.217	5.03	-50
PE(O-16:0/22:4)	752.56	331.264	5.21	-50
PE(O-16:0/22:5)	750.544	329.249	5.24	-50
PE(O-16:0/22:6)	748.529	327.233	5.16	-50
PE(O-18:0/18:1)	730.576	281.249	5.31	-50
PE(O-18:0/18:2)	728.56	279.233	5.31	-50
PE(O-18:0/20:3)	754.576	305.249	5.08	-50
PE(O-18:0/20:4)	752.56	303.233	4.97	-50
PE(O-18:0/20:5)	750.544	301.217	5	-50
PE(O-18:0/22:4)	780.591	331.264	5.13	-50
PE(O-18:0/22:5)	778.576	329.249	5.16	-50
PE(O-18:0/22:6)	776.56	327.233	5.08	-50
PE(P-16:0/18:1)	700.5	281.249	5.2	-50
PE(P-16:0/18:2)	698.5	279.233	5.23	-50
PE(P-16:0/20:3)	724.5	305.249	5.06	-50
PE(P-16:0/20:4)	722.5	303.233	5.06	-50
PE(P-16:0/20:5)	720.5	301.217	5.09	-50
PE(P-16:0/22:4)	750.5	331.264	5.06	-50
PE(P-16:0/22:5)	748.5	329.249	5.09	-50
PE(P-16:0/22:6)	746.5	327.233	5.03	-50
PE(P-18:0/16:0)	702.5	255.233	5.44	-50
PE(P-18:0/16:1)	700.5	253.217	5.35	-50
PE(P-18:0/18:1)	728.6	281.249	5.15	-50
PE(P-18:0/18:2)	726.5	279.233	5.15	-50
PE(P-18:0/18:3)	724.5	277.217	5.2	-50
PE(P-18:0/20:2)	754.6	307.264	5.12	-50
PE(P-18:0/20:3)	752.6	305.249	5.09	-50
PE(P-18:0/20:4)	750.5	303.233	5	-50
PE(P-18:0/20:5)	748.5	301.217	5	-50
PE(P-18:0/22:4)	778.6	331.264	5	-50
PE(P-18:0/22:5)	776.6	329.249	5	-50
PE(P-18:0/22:6)	774.5	327.233	4.94	-50
PE(P-18:1/16:0)	700.5	255.233	5.23	-50
PE(P-18:1/18:1)	726.5	281.249	5.15	-50
PE(P-18:1/18:2)	724.5	279.233	5.15	-50
PE(P-18:1/20:3)	750.5	305.249	4.97	-50
PE(P-18:1/20:4)	748.5	303.233	4.97	-50
PE(P-18:1/20:5)	746.5	301.217	5.03	-50
PE(P-18:1/22:4)	776.6	331.264	5	-50
PE(P-18:1/22:5)	774.5	329.249	5	-50
PE(P-18:1/22:6)	772.5	327.233	4.94	-50
PE(P-18:2/18:2)	722.5	279.233	5.17	-50
PE(P-18:2/20:4)	746.5	303.233	5.03	-50
LPG(18:1)	509.289	281.249	3.7	-50
PG(16:0/16:0)	721.503	255.233	2	-50
PG(16:0/16:1)	719.487	253.217	2	-50
PG(16:0/18:1)	747.518	281.249	1.97	-50
PG(16:0/18:2)	745.503	279.233	1.97	-50
PG(16:0/20:2)	773.534	307.264	1.94	-50
PG(16:0/20:3)	771.518	305.249	1.92	-50
PG(16:0/20:4)	769.503	303.233	1.85	-50
PG(18:0/18:0)	777.565	283.264	1.91	-50
PG(18:0/18:1)	775.549	281.249	1.91	-50
PG(18:0/18:2)	773.534	279.233	1.91	-50
PG(18:0/20:2)	801.565	307.264	1.88	-50
PG(18:0/20:3)	799.549	305.249	1.85	-50
PG(18:0/20:4)	797.534	303.233	1.79	-50
PG(18:1/18:1)	773.534	281.249	1.92	-50
PG(18:1/18:2)	771.518	279.233	1.92	-50
PG(18:1/20:4)	795.518	303.233	1.97	-50
PG(18:2/18:2)	769.503	279.233	1.92	-50
PG(18:2/20:4)	793.503	303.233	2.11	-50
PI(14:0/18:2)	805.487	279.233	4.79	-60
PI(14:0/20:4)	829.487	303.233	4.65	-60
PI(14:0/22:6)	853.487	327.233	4.59	-60
PI(16:0/16:0)	809.518	255.233	4.2	-60
PI(16:0/16:1)	807.503	253.217	4.18	-60
PI(16:0/18:1)	835.534	281.249	4.06	-60
PI(16:0/18:2)	833.518	279.233	4.12	-60
PI(16:0/20:3)	859.534	305.249	4.04	-60
PI(16:0/20:4)	857.518	303.233	3.95	-60
PI(16:0/22:5)	883.534	329.249	3.9	-60
PI(16:0/22:6)	881.518	327.233	3.89	-60
PI(18:0/18:1)	863.565	281.249	4.01	-60
PI(18:0/18:2)	861.55	279.233	4.04	-60
PI(18:0/20:2)	889.581	307.264	3.95	-60
PI(18:0/20:3)	887.565	305.249	4.01	-60
PI(18:0/20:4)	885.55	303.233	3.8	-60
PI(18:0/22:4)	913.581	331.264	3.77	-60
PI(18:0/22:5)	911.565	329.249	3.8	-60
PI(18:0/22:6)	909.55	327.233	3.74	-60
PI(18:1/18:1)	861.55	281.249	4	-60
PI(18:1/18:2)	859.534	279.233	4	-60
PI(18:1/20:4)	883.534	303.233	3.8	-60
PS(16:0/18:1)	760.513	281.249	5.17	-50
PS(16:0/20:4)	782.498	303.233	5.03	-50
PS(16:0/22:4)	810.529	331.264	5.03	-50
PS(16:0/22:5)	808.513	329.249	5.03	-50
PS(16:0/22:6)	806.498	327.233	5	-50
PS(18:0/18:0)	790.56	283.264	5.09	-50
PS(18:0/18:1)	788.545	281.249	5.09	-50
PS(18:0/18:2)	786.529	279.233	5.15	-50
PS(18:0/20:4)	810.529	303.233	4.97	-50
PS(18:0/22:6)	834.529	327.233	5	-50
PS(18:1/18:1)	786.529	281.249	5.17	-50
PS(18:1/18:2)	784.513	279.233	5.15	-50
PS(18:1/20:3)	810.529	305.249	5.09	-50
PS(18:1/20:4)	808.513	303.233	4.97	-50
PS(18:1/20:5)	806.498	301.217	5	-50
PS(18:1/22:4)	836.545	331.264	4.97	-50
PS(18:1/22:5)	834.529	329.249	4.98	-50
PS(18:1/22:6)	832.513	327.233	4.91	-50
PS(18:2/16:1)	756.482	279.233	5.2	-50
PS(18:2/18:2)	782.498	279.233	5.03	-50
PS(18:2/20:3)	808.513	305.249	4.91	-50
PS(18:2/20:4)	806.498	303.233	4.86	-50
PS(18:2/20:5)	804.482	301.217	5	-50
PS(18:2/22:6)	830.498	327.233	4.9	-50
PS(20:0/20:4)	838.56	303.233	5	-50
FFA(16:0)-Hd9_Lipidyzer.IS	264.1	264.1	0.86	-10
FFA(17:0)-Hd9_Lipidyzer.IS	278.22	278.1	0.86	-10
FFA(14:0)	227.1	227.1	0.89	-10
FFA(14:1)	225.1	225.1	0.89	-10
FFA(16:0)	255.1	255.1	0.86	-10
FFA(16:1)	253.1	253.1	0.86	-10
FFA(16:2)	251.1	251.1	0.88	-10
FFA(18:0)	283.2	283.2	0.83	-10
FFA(18:1)	281.2	281.2	0.83	-10
FFA(18:2)	279.2	279.2	0.83	-10
FFA(18:3)	277.2	277.2	0.86	-10
FFA(20:0)	311.2	311.2	0.81	-10
FFA(20:1)	309.2	309.2	0.81	-10
FFA(20:2)	307.2	307.2	0.81	-10
FFA(20:3)	305.2	305.2	0.81	-10
FFA(20:4)	303.2	303.2	0.81	-10
FFA(20:5)	301.2	301.2	0.81	-10
FFA(22:4)	331.3	331.3	0.81	-10
FFA(22:5)	329.2	329.2	0.81	-10
FFA(22:6)	327.2	327.2	0.83	-10
FFA(24:0)	367.3	367.3	0.75	-10
FFA(24:1)	365.3	365.3	0.75	-10

## Sheet: Sheet3
Sheet 3 Ion adducts of lipids
lipid classes	ion adducts
SM	[M + H]+
CE	[M + H]+
CER	[M + H]+
DCER	[M + H]+
HCER	[M + H]+
LCER	[M + H]+
TAG	[M + NH4]+
DAG	[M + NH4]+
FFA	[M − H]−
PE	[M − H]−
LPE	[M − H]−
PC	[M + AcO]−
LPC	[M + AcO]−

## Sheet: Sheet 4
Sheet 4 Association of fatty acid chain length and saturation level with LC risk by different lipid classes or subclasses through multivariable-adjusted conditional logistic regression.
Lipid	No.of carton atoms	No.of double bonds	OR	LCI	UCI	P	BH
CE(18:1)+H	18	1	1.73485	1.15615	2.60323	0.00779803	0.0182861
CE(18:2)+H	18	2	1.38259	0.959216	1.99282	0.0824337	0.127551
CE(18:3)+H	18	3	1.78592	1.18757	2.68572	0.00534014	0.0132409
CE(20:3)+H	20	3	2.12361	1.33777	3.37106	0.00140211	0.00444125
CE(20:4)+H	20	4	1.77515	1.14983	2.74057	0.00959623	0.0215826
CE(20:5)+H	20	5	0.630121	0.422755	0.939203	0.0233302	0.044386
CE(22:5)+H	22	5	1.80337	1.18211	2.75114	0.00621305	0.015096
CE(22:6)+H	22	6	1.44077	0.972403	2.13474	0.0686897	0.110094
CER(16:0)+H	16	0	2.0714	1.31455	3.264	0.00169656	0.00523684
CER(18:0)+H	18	0	3.24885	1.83146	5.76319	<0.001	0.00109668
CER(20:0)+H	20	0	2.51693	1.52811	4.14562	<0.001	0.00159515
CER(22:0)+H	22	0	1.66622	1.12764	2.46202	0.0103763	0.0229113
CER(22:1)+H	22	1	1.70572	1.15073	2.52835	0.00783435	0.0183003
CER(24:0)+H	24	0	1.48559	1.01874	2.16639	0.0397428	0.0698788
CER(24:1)+H	24	1	3.18	1.82388	5.54444	<0.001	0.00109668
CER(26:0)+H	26	0	1.20528	0.864328	1.68072	0.271097	0.357329
CER(26:1)+H	26	1	2.07612	1.31287	3.28307	0.00178301	0.00542071
DAG(16:0/16:0)+NH4	32	0	0.274939	0.136673	0.553082	<0.001	0.00160134
DAG(16:0/18:0)+NH4	34	0	0.294059	0.154294	0.560429	<0.001	0.00118286
DAG(16:0/18:1)+NH4	34	1	2.91461	1.69535	5.01074	<0.001	0.00109668
DAG(16:0/18:2)+NH4	34	2	3.90261	2.07009	7.35734	<0.001	0.00109668
DAG(18:1/18:1)+NH4	36	2	2.11213	1.3194	3.38116	0.00184215	0.00554477
DAG(18:1/18:2)+NH4	36	3	1.56561	1.06327	2.30528	0.0231648	0.0442105
DAG(18:1/20:4)+NH4	38	5	1.64458	1.06314	2.544	0.0254141	0.0477502
DAG(18:1/22:6)+NH4	40	7	0.412487	0.24932	0.682439	<0.001	0.00226799
DAG(18:2/20:4)+NH4	38	6	1.35212	0.870604	2.09995	0.179253	0.252205
DAG(18:2/22:6)+NH4	40	8	0.250809	0.126776	0.496193	<0.001	0.00109668
DCER(22:0)+H	22	0	1.17189	0.820243	1.67428	0.383551	0.477465
DCER(22:1)+H	22	1	3.12426	1.77624	5.49532	<0.001	0.00109668
DCER(24:0)+H	24	0	1.13149	0.801212	1.5979	0.483014	0.580961
DCER(24:1)+H	24	1	1.56542	1.06823	2.29402	0.0215355	0.0417595
FFA(14:0)	14	0	0.990618	0.692176	1.41774	0.958897	0.970121
FFA(14:1)	14	1	8.44165	2.95563	24.1104	<0.001	0.00109668
FFA(16:0)	16	0	3.74932	1.925	7.30256	<0.001	0.00109668
FFA(16:1)	16	1	1.63102	1.09814	2.42248	0.0153591	0.0315832
FFA(16:2)	16	2	0.279299	0.147731	0.528043	<0.001	0.00109668
FFA(18:0)	18	0	2.90166	1.58473	5.31294	<0.001	0.00226799
FFA(18:1)	18	1	2.94616	1.69596	5.11796	<0.001	0.00113503
FFA(18:2)	18	2	2.40355	1.48989	3.8775	<0.001	0.00165992
FFA(18:3)	18	3	1.32079	0.898856	1.94079	0.156504	0.226322
FFA(20:0)	20	0	14.4421	2.66966	78.1279	0.00193527	0.00579622
FFA(20:1)	20	1	2.15885	1.32374	3.5208	0.00204363	0.00606076
FFA(20:2)	20	2	1.30326	0.910322	1.86582	0.147964	0.217806
FFA(20:3)	20	3	3.66619	1.80264	7.45628	<0.001	0.00165992
FFA(20:4)	20	4	7.49839	2.69856	20.8355	<0.001	0.00109668
FFA(20:5)	20	5	0.550024	0.37859	0.799088	0.00170753	0.00524392
FFA(22:4)	22	4	2.60967	1.47974	4.6024	<0.001	0.00339657
FFA(22:5)	22	5	1.26148	0.847166	1.87842	0.252838	0.339172
FFA(22:6)	22	6	0.870449	0.594255	1.27501	0.476194	0.573899
FFA(24:0)	24	0	0.601274	0.400297	0.903155	0.0142588	0.0300578
FFA(24:1)	24	1	0.224235	0.0978746	0.51373	<0.001	0.00192972
HCER(16:0)+H	16	0	2.36379	1.46348	3.81795	<0.001	0.00201776
HCER(18:0)+H	18	0	2.67049	1.54353	4.62029	<0.001	0.00203921
HCER(20:0)+H	20	0	2.27618	1.41759	3.6548	<0.001	0.00258934
HCER(22:0)+H	22	0	1.65803	1.13717	2.41746	0.00858709	0.0197536
HCER(24:0)+H	24	0	1.93298	1.25921	2.96728	0.00257828	0.00715532
HCER(24:1)+H	24	1	3.18525	1.73605	5.84421	<0.001	0.00117866
HCER(d18:0/18:0)+HCER(d36:0)	36	0	2.41614	1.42296	4.10252	0.0010915	0.00377349
HCER(d18:0/20:0)+HCER(d38:0)	38	0	1.6281	1.09523	2.42023	0.0159668	0.0324158
HCER(d18:0/22:0)+HCER(d40:0)	40	0	0.971262	0.706369	1.33549	0.857576	0.900752
LCER(16:0)+H	16	0	1.04265	0.748137	1.45311	0.805203	0.863737
LCER(18:0)+H	18	0	1.22577	0.85699	1.75325	0.264929	0.353045
LPC(14:0)+AcO	14	0	1.23415	0.899886	1.69259	0.191748	0.267915
LPC(16:0)+AcO	16	0	5.42328	2.55851	11.4957	<0.001	0.00109668
LPC(16:1)+AcO	16	1	2.48335	1.55535	3.96503	<0.001	0.00114776
LPC(18:0)+AcO	18	0	4.83132	2.38146	9.80144	<0.001	0.00109668
LPC(18:1)+AcO	18	1	4.54379	2.278	9.06322	<0.001	0.00109668
LPC(18:2)+AcO	18	2	1.4784	1.03625	2.1092	0.0310558	0.0565926
LPC(18:3)+AcO	18	3	1.6453	1.12681	2.40235	0.00993308	0.0220938
LPC(20:0)+AcO	20	0	0.91909	0.678349	1.24527	0.586121	0.680241
LPC(20:1)+AcO	20	1	2.38475	1.46415	3.8842	<0.001	0.00211845
LPC(20:2)+AcO	20	2	3.86423	2.03503	7.33764	<0.001	0.00109668
LPC(20:3)+AcO	20	3	2.86459	1.68671	4.86501	<0.001	0.00109668
LPC(20:4)+AcO	20	4	3.65764	1.96349	6.81354	<0.001	0.00109668
LPC(20:5)+AcO	20	5	0.638354	0.441637	0.922693	0.0169397	0.0340483
LPC(22:4)+AcO	22	4	7.45551	2.74054	20.2823	<0.001	0.00109668
LPC(22:5)+AcO	22	5	2.10636	1.36836	3.24238	<0.001	0.00272576
LPC(22:6)+AcO	22	6	1.53137	1.03859	2.25795	0.0314679	0.0570003
LPE(16:0)	16	0	4.00347	2.06987	7.74336	<0.001	0.00109668
LPE(18:0)	18	0	3.89215	2.0416	7.42007	<0.001	0.00109668
LPE(18:1)	18	1	2.18267	1.36636	3.48666	0.00109028	0.00377349
LPE(18:2)	18	2	1.4756	0.971704	2.2408	0.0679557	0.109635
LPE(20:3)	20	3	2.57402	1.46394	4.52587	0.00102475	0.00364104
LPE(20:4)	20	4	2.92036	1.68424	5.06371	<0.001	0.00114084
LPE(22:6)	22	6	1.13553	0.801512	1.60874	0.474549	0.573058
LPG(18:1)	18	1	1.89386	0.938953	3.81991	0.0744237	0.118179
PA(34:1)+PA(18:0/16:1)	34	1	1.12159	0.806718	1.55935	0.494934	0.590602
PA(36:1)+PA(18:0/18:1)	36	1	0.620126	0.432764	0.888605	0.00922941	0.0209917
PA(36:2)+PA(18:0/18:2)	36	2	0.554721	0.368251	0.835614	0.00481595	0.012191
PA(38:3)+PA(18:0/20:3)	38	3	0.864734	0.62449	1.1974	0.381498	0.476872
PA(38:4)+PA(18:0/20:4)	38	4	0.428657	0.267509	0.68688	<0.001	0.00199887
PA(38:5)+PA(18:0/20:5)	38	5	0.193536	0.0829503	0.45155	<0.001	0.00114838
PA(40:4)+PA(18:0/22:4)	40	4	0.890943	0.642097	1.23623	0.489573	0.586491
PA(40:5)+PA(18:0/22:5)	40	5	0.523508	0.343692	0.797403	0.00257463	0.00715532
PA(40:6)+PA(18:0/22:6)	40	6	0.408979	0.180357	0.927406	0.0323242	0.0583765
PA(38:1)+PA(20:0/18:1)	38	1	0.602098	0.420946	0.861208	0.00546621	0.0134982
PA(38:2)+PA(20:0/18:2)	38	2	0.626374	0.433084	0.90593	0.0129664	0.027622
PA(40:3)+PA(20:0/20:3)	40	3	0.663513	0.468709	0.939281	0.0207116	0.040291
PA(40:4)+PA(20:0/20:4)	40	4	0.517541	0.340988	0.785508	0.00197452	0.00588465
PA(40:5)+PA(20:0/20:5)	40	5	0.178318	0.0719453	0.441965	<0.001	0.00117866
PA(42:4)+PA(20:0/22:4)	42	4	0.786537	0.552687	1.11933	0.182278	0.255274
PA(42:5)+PA(20:0/22:5)	42	5	0.352023	0.204601	0.605667	<0.001	0.00114855
PA(42:6)+PA(20:0/22:6)	42	6	0.336206	0.18852	0.59959	<0.001	0.00127749
PC(32:1)+PC(14:0/18:1)+AcO	32	1	1.07976	0.774004	1.5063	0.651427	0.740815
PC(32:2)+PC(14:0/18:2)+AcO	32	2	0.554068	0.366823	0.836893	0.00501321	0.012561
PC(34:4)+PC(14:0/20:4)+AcO	34	4	0.546067	0.357268	0.834637	0.00518955	0.0129205
PC(36:6)+PC(14:0/22:6)+AcO	36	6	0.460962	0.299828	0.708692	<0.001	0.00195575
PC(30:0)+PC(16:0/14:0)+AcO	30	0	1.09243	0.791532	1.50771	0.590724	0.681279
PC(32:0)+PC(16:0/16:0)+AcO	32	0	6.14625	2.48332	15.212	<0.001	0.00109668
PC(32:1)+PC(16:0/16:1)+AcO	32	1	1.87416	1.22116	2.87635	0.0040512	0.0105302
PC(34:0)+PC(16:0/18:0)+AcO	34	0	9.34056	3.08538	28.2773	<0.001	0.00109668
PC(34:1)+PC(16:0/18:1)+AcO	34	1	9.11886	2.97975	27.9063	<0.001	0.00109668
PC(34:2)+PC(16:0/18:2)+AcO	34	2	2.93762	1.68892	5.10955	<0.001	0.00114084
PC(34:3)+PC(16:0/18:3)+AcO	34	3	1.88439	1.25675	2.8255	0.00217161	0.00628625
PC(36:1)+PC(16:0/20:1)+AcO	36	1	2.35898	1.42385	3.90825	<0.001	0.0032425
PC(36:2)+PC(16:0/20:2)+AcO	36	2	4.23969	2.12802	8.44681	<0.001	0.00109668
PC(36:3)+PC(16:0/20:3)+AcO	36	3	5.61422	2.47625	12.7287	<0.001	0.00109668
PC(36:4)+PC(16:0/20:4)+AcO	36	4	4.87491	2.2566	10.5312	<0.001	0.00109668
PC(36:5)+PC(16:0/20:5)+AcO	36	5	0.499618	0.326614	0.764261	0.00137615	0.00438195
PC(38:4)+PC(16:0/22:4)+AcO	38	4	14.0981	3.68082	53.9977	<0.001	0.00109668
PC(38:5)+PC(16:0/22:5)+AcO	38	5	3.24025	1.79226	5.8581	<0.001	0.00109668
PC(38:6)+PC(16:0/22:6)+AcO	38	6	1.71615	1.13431	2.59643	0.0105728	0.0231758
PC(34:2)+PC(16:1/18:1)+AcO	34	2	2.32975	1.40299	3.86869	0.00108099	0.00377349
PC(34:3)+PC(16:1/18:2)+AcO	34	3	0.876339	0.623495	1.23172	0.447244	0.54553
PC(34:1)+PC(18:0/16:1)+AcO	34	1	2.07942	1.29798	3.33132	0.00232985	0.00660009
PC(36:0)+PC(18:0/18:0)+AcO	36	0	7.0485	2.80074	17.7386	<0.001	0.00109668
PC(36:1)+PC(18:0/18:1)+AcO	36	1	6.94905	2.74395	17.5984	<0.001	0.00109668
PC(36:2)+PC(18:0/18:2)+AcO	36	2	2.94821	1.68723	5.15161	<0.001	0.00114838
PC(36:3)+PC(18:0/18:3)+AcO	36	3	2.14761	1.35431	3.40561	0.00115722	0.00388954
PC(38:0)+PC(18:0/20:0)+AcO	38	0	0.940369	0.67149	1.31691	0.720478	0.799797
PC(38:1)+PC(18:0/20:1)+AcO	38	1	3.80453	1.99417	7.25839	<0.001	0.00109668
PC(38:2)+PC(18:0/20:2)+AcO	38	2	6.0884	2.47859	14.9555	<0.001	0.00109668
PC(38:3)+PC(18:0/20:3)+AcO	38	3	4.70904	2.20275	10.067	<0.001	0.00109668
PC(38:4)+PC(18:0/20:4)+AcO	38	4	4.84624	2.28566	10.2754	<0.001	0.00109668
PC(38:5)+PC(18:0/20:5)+AcO	38	5	0.554564	0.370057	0.831064	0.00428283	0.0110103
PC(40:4)+PC(18:0/22:4)+AcO	40	4	14.5504	3.58264	59.0946	<0.001	0.00117866
PC(40:5)+PC(18:0/22:5)+AcO	40	5	5.79202	2.50128	13.4121	<0.001	0.00109668
PC(40:6)+PC(18:0/22:6)+AcO	40	6	2.20267	1.37985	3.51615	<0.001	0.00340948
PC(34:2)+PC(18:1/16:1)+AcO	34	2	2.02008	1.29075	3.16153	0.00209281	0.00612385
PC(36:2)+PC(18:1/18:1)+AcO	36	2	3.60641	1.85759	7.00166	<0.001	0.00114838
PC(36:3)+PC(18:1/18:2)+AcO	36	3	1.79346	1.17639	2.73422	0.00662732	0.0158479
PC(36:4)+PC(18:1/18:3)+AcO	36	4	1.76667	1.12126	2.78358	0.014153	0.029939
PC(38:2)+PC(18:1/20:1)+AcO	38	2	1.19992	0.868777	1.65729	0.268643	0.357119
PC(38:3)+PC(18:1/20:2)+AcO	38	3	2.53448	1.55574	4.12897	<0.001	0.00117866
PC(38:4)+PC(18:1/20:3)+AcO	38	4	4.66338	2.01386	10.7987	<0.001	0.00165992
PC(38:5)+PC(18:1/20:4)+AcO	38	5	3.13687	1.67845	5.86251	<0.001	0.0016703
PC(38:6)+PC(18:1/20:5)+AcO	38	6	0.369179	0.221592	0.615065	<0.001	0.00114084
PC(40:5)+PC(18:1/22:4)+AcO	40	5	9.4773	2.8427	31.5964	<0.001	0.00142333
PC(40:6)+PC(18:1/22:5)+AcO	40	6	1.89819	1.22301	2.94612	0.0042693	0.0110103
PC(40:7)+PC(18:1/22:6)+AcO	40	7	1.03276	0.727582	1.46595	0.85685	0.900752
PC(34:3)+PC(18:2/16:1)+AcO	34	3	1.00925	0.713254	1.42808	0.958536	0.970121
PC(36:4)+PC(18:2/18:2)+AcO	36	4	1.09266	0.789211	1.51278	0.593445	0.681279
PC(36:5)+PC(18:2/18:3)+AcO	36	5	0.981458	0.711351	1.35413	0.909267	0.934821
PC(38:3)+PC(18:2/20:1)+AcO	38	3	0.981048	0.703795	1.36752	0.910099	0.934821
PC(38:4)+PC(18:2/20:2)+AcO	38	4	1.18612	0.816632	1.72277	0.370106	0.467462
PC(38:5)+PC(18:2/20:3)+AcO	38	5	1.25431	0.838015	1.87742	0.270828	0.357329
PC(38:6)+PC(18:2/20:4)+AcO	38	6	1.15597	0.803025	1.66405	0.43552	0.532579
PC(40:8)+PC(18:2/22:6)+AcO	40	8	0.343863	0.196137	0.602852	<0.001	0.00117866
PC(40:4)+PC(20:0/20:4)+AcO	40	4	0.321955	0.18604	0.557163	<0.001	0.00109668
PC(42:6)+PC(20:0/22:6)+AcO	42	6	0.396891	0.238213	0.661266	<0.001	0.00186448
PE(32:0)+PE(16:0/16:0)	32	0	2.48128	1.49251	4.12508	<0.001	0.00206878
PE(32:1)+PE(16:0/16:1)	32	1	1.29085	0.901039	1.8493	0.163969	0.235074
PE(34:1)+PE(16:0/18:1)	34	1	1.60335	1.09771	2.3419	0.0145969	0.0303474
PE(34:2)+PE(16:0/18:2)	34	2	2.37583	1.40003	4.03175	0.0013411	0.0043221
PE(36:1)+PE(16:0/20:1)	36	1	1.19797	0.836952	1.71472	0.323545	0.415594
PE(36:2)+PE(16:0/20:2)	36	2	1.7346	1.17	2.57167	0.00611757	0.0149239
PE(36:3)+PE(16:0/20:3)	36	3	1.32696	0.8926	1.97269	0.162009	0.232816
PE(36:4)+PE(16:0/20:4)	36	4	1.69422	1.15402	2.48729	0.00711931	0.0168249
PE(36:5)+PE(16:0/20:5)	36	5	0.423281	0.25977	0.689713	<0.001	0.00226799
PE(38:4)+PE(16:0/22:4)	38	4	1.44738	0.997806	2.09953	0.0513685	0.0884359
PE(38:5)+PE(16:0/22:5)	38	5	1.05556	0.753887	1.47795	0.752862	0.825148
PE(38:6)+PE(16:0/22:6)	38	6	1.35288	0.993225	1.84277	0.0552568	0.0929418
PE(36:0)+PE(18:0/18:0)	36	0	0.413466	0.251696	0.679208	<0.001	0.00212677
PE(36:1)+PE(18:0/18:1)	36	1	0.949922	0.667076	1.3527	0.775746	0.844112
PE(36:2)+PE(18:0/18:2)	36	2	1.62217	1.08521	2.42481	0.0183402	0.0363797
PE(36:3)+PE(18:0/18:3)	36	3	1.29978	0.913309	1.8498	0.145309	0.214944
PE(38:1)+PE(18:0/20:1)	38	1	0.529676	0.333864	0.840334	0.00696133	0.0165161
PE(38:2)+PE(18:0/20:2)	38	2	1.10183	0.772116	1.57234	0.593004	0.681279
PE(38:3)+PE(18:0/20:3)	38	3	1.39022	0.960235	2.01276	0.0809773	0.125942
PE(38:4)+PE(18:0/20:4)	38	4	1.14996	0.824786	1.60332	0.409952	0.505134
PE(38:5)+PE(18:0/20:5)	38	5	0.396774	0.23588	0.667414	<0.001	0.00212677
PE(40:4)+PE(18:0/22:4)	40	4	0.835092	0.585341	1.19141	0.32023	0.413089
PE(40:5)+PE(18:0/22:5)	40	5	0.831503	0.583491	1.18493	0.307242	0.398033
PE(40:6)+PE(18:0/22:6)	40	6	1.16208	0.860128	1.57003	0.327842	0.420221
PE(34:2)+PE(18:1/16:1)	34	2	0.273316	0.139246	0.536469	<0.001	0.00114855
PE(36:2)+PE(18:1/18:1)	36	2	1.02703	0.720026	1.46493	0.88298	0.9163
PE(36:3)+PE(18:1/18:2)	36	3	1.38123	0.939975	2.02963	0.100025	0.151143
PE(38:4)+PE(18:1/20:3)	38	4	0.965515	0.666703	1.39825	0.852648	0.898968
PE(38:5)+PE(18:1/20:4)	38	5	0.890438	0.633996	1.25061	0.503121	0.59919
PE(40:5)+PE(18:1/22:4)	40	5	0.943322	0.673424	1.32139	0.734375	0.813142
PE(40:7)+PE(18:1/22:6)	40	7	0.677799	0.467776	0.982119	0.0398483	0.0698788
PE(34:3)+PE(18:2/16:1)	34	3	0.277886	0.14252	0.541822	<0.001	0.001149
PE(36:4)+PE(18:2/18:2)	36	4	2.09187	1.30691	3.34827	0.00210324	0.00612385
PE(38:4)+PE(18:2/20:2)	38	4	0.62447	0.426284	0.914796	0.0156436	0.0319743
PE(38:6)+PE(18:2/20:4)	38	6	0.8743	0.614868	1.24319	0.4545	0.552154
PE(O-34:1)PE(O-16:0/18:1)	34	1	0.642884	0.437535	0.94461	0.0244364	0.0462002
PE(O-34:2)PE(O-16:0/18:2)	34	2	0.792432	0.544202	1.15389	0.224974	0.305864
PE(O-36:4)PE(O-16:0/20:4)	36	4	0.618815	0.409314	0.935546	0.0228523	0.0437521
PE(O-36:5)PE(O-16:0/20:5)	36	5	0.244094	0.109986	0.541727	<0.001	0.00220122
PE(O-38:4)PE(O-16:0/22:4)	38	4	1.99345	1.2958	3.0667	0.00169489	0.00523684
PE(O-38:5)PE(O-16:0/22:5)	38	5	0.710687	0.486759	1.03763	0.0769508	0.120609
PE(O-38:6)PE(O-16:0/22:6)	38	6	0.459962	0.287749	0.735243	0.00117414	0.00392462
PE(O-36:1)PE(O-18:0/18:1)	36	1	1.10829	0.790612	1.55361	0.550761	0.647011
PE(O-36:2)PE(O-18:0/18:2)	36	2	1.09049	0.76246	1.55964	0.635159	0.725041
PE(O-38:3)PE(O-18:0/20:3)	38	3	1.39636	0.946617	2.05978	0.0923054	0.140313
PE(O-38:4)PE(O-18:0/20:4)	38	4	0.414188	0.260908	0.65752	<0.001	0.00117866
PE(O-38:5)PE(O-18:0/20:5)	38	5	0.171088	0.0710378	0.412051	<0.001	0.00109668
PE(O-40:4)PE(O-18:0/22:4)	40	4	1.24599	0.890135	1.74411	0.199944	0.277445
PE(O-40:5)PE(O-18:0/22:5)	40	5	0.790116	0.544727	1.14605	0.21441	0.294208
PE(O-40:6)PE(O-18:0/22:6)	40	6	0.554375	0.35454	0.866846	0.00969604	0.0217263
PE(P-34:1)PE(P-16:0/18:1)	34	1	0.662089	0.462786	0.947224	0.0240272	0.0455689
PE(P-34:2)PE(P-16:0/18:2)	34	2	0.629583	0.428882	0.924206	0.0181571	0.036135
PE(P-36:3)PE(P-16:0/20:3)	36	3	0.619505	0.415724	0.923175	0.0186364	0.0368464
PE(P-36:4)PE(P-16:0/20:4)	36	4	0.488749	0.318208	0.750691	0.00107684	0.00377349
PE(P-36:5)PE(P-16:0/20:5)	36	5	0.265946	0.132476	0.533888	<0.001	0.00117866
PE(P-38:4)PE(P-16:0/22:4)	38	4	0.971232	0.695311	1.35665	0.864077	0.90444
PE(P-38:5)PE(P-16:0/22:5)	38	5	0.7374	0.45682	1.19031	0.212445	0.293446
PE(P-38:6)PE(P-16:0/22:6)	38	6	0.41772	0.249823	0.698455	<0.001	0.00326335
PE(P-34:0)PE(P-18:0/16:0)	34	0	1.55248	1.04606	2.30407	0.0289999	0.0534907
PE(P-34:1)PE(P-18:0/16:1)	34	1	0.486707	0.312506	0.758014	0.00144441	0.00455138
PE(P-36:1)PE(P-18:0/18:1)	36	1	0.644115	0.455763	0.910305	0.0126865	0.0273143
PE(P-36:2)PE(P-18:0/18:2)	36	2	0.752528	0.535047	1.05841	0.102309	0.153973
PE(P-36:3)PE(P-18:0/18:3)	36	3	0.530414	0.35235	0.798464	0.00237829	0.00669241
PE(P-38:2)PE(P-18:0/20:2)	38	2	0.82654	0.589166	1.15955	0.270056	0.357329
PE(P-38:3)PE(P-18:0/20:3)	38	3	0.729484	0.526579	1.01057	0.057866	0.0966734
PE(P-38:4)PE(P-18:0/20:4)	38	4	0.598909	0.414597	0.865158	0.00629869	0.0151821
PE(P-38:5)PE(P-18:0/20:5)	38	5	0.256298	0.127418	0.51554	<0.001	0.00114084
PE(P-40:4)PE(P-18:0/22:4)	40	4	0.837573	0.598311	1.17251	0.301742	0.391747
PE(P-40:5)PE(P-18:0/22:5)	40	5	0.46967	0.304825	0.723662	<0.001	0.00241891
PE(P-40:6)PE(P-18:0/22:6)	40	6	0.347834	0.201392	0.60076	<0.001	0.00114838
PE(P-34:1)PE(P-18:1/16:0)	34	1	0.719344	0.508442	1.01773	0.062785	0.10294
PE(P-36:2)PE(P-18:1/18:1)	36	2	1.06565	0.779941	1.45602	0.689689	0.771279
PE(P-36:3)PE(P-18:1/18:2)	36	3	0.966983	0.691175	1.35285	0.844631	0.897194
PE(P-38:4)PE(P-18:1/20:3)	38	4	1.08725	0.804627	1.46913	0.58601	0.680241
PE(P-38:5)PE(P-18:1/20:4)	38	5	0.98056	0.71156	1.35125	0.904488	0.932224
PE(P-38:6)PE(P-18:1/20:5)	38	6	0.266771	0.135048	0.526973	<0.001	0.00114776
PE(P-40:5)PE(P-18:1/22:4)	40	5	1.19144	0.866247	1.63871	0.281454	0.370057
PE(P-40:6)PE(P-18:1/22:5)	40	6	0.783269	0.52796	1.16204	0.224834	0.305864
PE(P-40:7)PE(P-18:1/22:6)	40	7	0.587702	0.398056	0.867702	0.00749955	0.0176546
PE(P-36:4)PE(P-18:2/18:2)	36	4	0.544385	0.333207	0.889401	0.0151853	0.0313553
PE(P-38:6)PE(P-18:2/20:4)	38	6	0.687215	0.446001	1.05889	0.0890251	0.136355
PG(32:0)PG(16:0/16:0)	32	0	2.80391	1.65829	4.74098	<0.001	0.0011112
PG(32:1)PG(16:0/16:1)	32	1	1.22456	0.854918	1.75404	0.269168	0.357119
PG(34:1)PG(16:0/18:1)	34	1	1.76609	1.11898	2.78743	0.0145743	0.0303474
PG(34:2)PG(16:0/18:2)	34	2	1.47772	1.02367	2.13318	0.0370839	0.065794
PG(36:2)PG(16:0/20:2)	36	2	0.616434	0.376905	1.00819	0.0539197	0.0918914
PG(36:3)PG(16:0/20:3)	36	3	0.540629	0.336599	0.86833	0.0109607	0.0238644
PG(36:4)PG(16:0/20:4)	36	4	1.22082	0.842358	1.76933	0.291945	0.380662
PG(36:0)PG(18:0/18:0)	36	0	1.56915	1.07737	2.2854	0.0188524	0.0371522
PG(36:1)PG(18:0/18:1)	36	1	1.11738	0.781876	1.59685	0.54236	0.639625
PG(36:2)PG(18:0/18:2)	36	2	0.974247	0.691965	1.37168	0.881185	0.916008
PG(38:2)PG(18:0/20:2)	38	2	0.851777	0.589178	1.23142	0.393621	0.488995
PG(38:3)PG(18:0/20:3)	38	3	0.565845	0.37844	0.846052	0.00552868	0.0135969
PG(38:4)PG(18:0/20:4)	38	4	0.621712	0.413447	0.934887	0.0224043	0.0430305
PG(36:2)PG(18:1/18:1)	36	2	23.7528	4.01531	140.512	<0.001	0.00211845
PG(36:3)PG(18:1/18:2)	36	3	1.22267	0.866575	1.72508	0.252374	0.339172
PG(38:5)PG(18:1/20:4)	38	5	0.943353	0.671683	1.3249	0.736488	0.813142
PG(36:4)PG(18:2/18:2)	36	4	0.75336	0.533166	1.06449	0.108355	0.161863
PG(38:6)PG(18:2/20:4)	38	6	0.453574	0.285907	0.719568	<0.001	0.00297213
PI(32:2)PI(14:0/18:2)	32	2	1.42937	0.96501	2.11717	0.0747054	0.118316
PI(34:4)PI(14:0/20:4)	34	4	0.927705	0.655891	1.31216	0.671419	0.757852
PI(36:6)PI(14:0/22:6)	36	6	1.25401	0.902576	1.74229	0.177322	0.250654
PI(32:0)PI(16:0/16:0)	32	0	1.55011	1.06471	2.25682	0.0221881	0.0428875
PI(32:1)PI(16:0/16:1)	32	1	1.22812	0.834191	1.80808	0.297745	0.387388
PI(34:1)PI(16:0/18:1)	34	1	0.880853	0.590554	1.31385	0.534014	0.632247
PI(34:2)PI(16:0/18:2)	34	2	1.28501	0.915699	1.80328	0.146906	0.216776
PI(36:3)PI(16:0/20:3)	36	3	0.948661	0.65682	1.37017	0.778732	0.84462
PI(36:4)PI(16:0/20:4)	36	4	1.5004	0.997444	2.25697	0.0514536	0.0884359
PI(38:5)PI(16:0/22:5)	38	5	0.862179	0.607216	1.2242	0.407072	0.502609
PI(38:6)PI(16:0/22:6)	38	6	0.841836	0.599096	1.18293	0.321191	0.413449
PI(36:1)PI(18:0/18:1)	36	1	0.625986	0.394927	0.99223	0.0462445	0.0801659
PI(36:2)PI(18:0/18:2)	36	2	1.19619	0.863121	1.65777	0.281977	0.370057
PI(38:2)PI(18:0/20:2)	38	2	0.713421	0.496961	1.02416	0.0671689	0.108656
PI(38:3)PI(18:0/20:3)	38	3	0.694454	0.468853	1.02861	0.0688767	0.110094
PI(38:4)PI(18:0/20:4)	38	4	0.386198	0.103723	1.43796	0.156064	0.226322
PI(40:4)PI(18:0/22:4)	40	4	0.658187	0.450945	0.960672	0.0301646	0.0551347
PI(40:5)PI(18:0/22:5)	40	5	0.580096	0.372258	0.903973	0.0161279	0.0325949
PI(40:6)PI(18:0/22:6)	40	6	0.719939	0.510935	1.01444	0.0603763	0.0998023
PI(36:2)PI(18:1/18:1)	36	2	0.669797	0.468248	0.958101	0.0282133	0.0523591
PI(36:3)PI(18:1/18:2)	36	3	0.585016	0.373447	0.916445	0.0192345	0.037782
PI(38:5)PI(18:1/20:4)	38	5	0.625548	0.424928	0.920885	0.0174212	0.0349002
PS(34:1)PS(16:0/18:1)	34	1	0.541922	0.356845	0.822989	0.00405543	0.0105302
PS(36:4)PS(16:0/20:4)	36	4	0.386265	0.230691	0.646756	<0.001	0.00160976
PS(38:4)PS(16:0/22:4)	38	4	0.837878	0.566866	1.23846	0.374955	0.470638
PS(38:5)PS(16:0/22:5)	38	5	0.697695	0.47546	1.02381	0.0658086	0.10674
PS(38:6)PS(16:0/22:6)	38	6	0.679065	0.463574	0.994727	0.0469102	0.0810876
PS(36:0)PS(18:0/18:0)	36	0	1.25689	0.921561	1.71423	0.148725	0.218395
PS(36:1)PS(18:0/18:1)	36	1	0.742407	0.497606	1.10764	0.144524	0.214307
PS(36:2)PS(18:0/18:2)	36	2	1.26479	0.87287	1.83268	0.214456	0.294208
PS(38:4)PS(18:0/20:4)	38	4	0.341856	0.194623	0.600472	<0.001	0.00117866
PS(40:6)PS(18:0/22:6)	40	6	0.301522	0.161671	0.562348	<0.001	0.00114855
PS(36:2)PS(18:1/18:1)	36	2	0.748596	0.527625	1.06211	0.104731	0.156837
PS(36:3)PS(18:1/18:2)	36	3	0.641966	0.447877	0.920165	0.0158251	0.0322363
PS(38:4)PS(18:1/20:3)	38	4	1.067	0.754959	1.508	0.713322	0.793308
PS(38:5)PS(18:1/20:4)	38	5	0.499512	0.321094	0.777069	0.00207929	0.00612385
PS(38:6)PS(18:1/20:5)	38	6	0.171045	0.0710878	0.411551	<0.001	0.00109668
PS(40:5)PS(18:1/22:4)	40	5	0.730899	0.520951	1.02546	0.0696088	0.110825
PS(40:6)PS(18:1/22:5)	40	6	0.648699	0.437465	0.96193	0.0313142	0.0568921
PS(40:7)PS(18:1/22:6)	40	7	0.37244	0.223514	0.620594	<0.001	0.00114838
PS(34:3)PS(18:2/16:1)	34	3	0.392253	0.23492	0.654958	<0.001	0.00169034
PS(36:4)PS(18:2/18:2)	36	4	1.03847	0.735195	1.46686	0.830363	0.887579
PS(38:5)PS(18:2/20:3)	38	5	1.08324	0.740428	1.58477	0.680431	0.765169
PS(38:6)PS(18:2/20:4)	38	6	0.689404	0.464646	1.02288	0.0646619	0.105446
PS(38:7)PS(18:2/20:5)	38	7	0.508804	0.327444	0.790614	0.00265804	0.00730961
PS(40:8)PS(18:2/22:6)	40	8	0.943996	0.662401	1.3453	0.749825	0.824808
PS(40:4)PS(20:0/20:4)	40	4	0.519625	0.336178	0.803176	0.00321426	0.00864279
SM(14:0)+H	14	0	0.498361	0.318302	0.780277	0.00232969	0.00660009
SM(16:0)+H	16	0	1.51423	1.04146	2.20161	0.029804	0.0548068
SM(18:0)+H	18	0	1.92551	1.24748	2.97206	0.00309199	0.00835365
SM(18:1)+H	18	1	1.43395	0.992187	2.07241	0.0550832	0.0929418
SM(20:0)+H	20	0	1.02955	0.723266	1.46553	0.871589	0.909157
SM(20:1)+H	20	1	1.31446	0.924608	1.8687	0.12769	0.189809
SM(22:0)+H	22	0	1.07348	0.764078	1.50817	0.682717	0.766315
SM(22:1)+H	22	1	1.03011	0.736414	1.44095	0.862454	0.904306
SM(24:0)+H	24	0	1.11925	0.788913	1.5879	0.527844	0.626168
SM(24:1)+H	24	1	1.49938	1.02634	2.19046	0.0362263	0.0646517
SM(26:0)+H	26	0	0.996384	0.712707	1.39297	0.983096	0.985742
SM(26:1)+H	26	1	1.00499	0.681695	1.48161	0.979949	0.984833
TAG(44:0/FA16:0)+NH4	44	0	1.06563	0.734381	1.54631	0.737876	0.813142
TAG(44:1/FA16:0)+NH4	44	1	2.22439	1.36312	3.62984	0.00137531	0.00438195
TAG(44:1/FA18:1)+NH4	44	1	2.90797	1.67149	5.05914	<0.001	0.00114855
TAG(44:2/FA16:0)+NH4	44	2	1.90761	1.2297	2.95923	0.00393967	0.0103631
TAG(46:0/FA14:0)+NH4	46	0	0.757333	0.515484	1.11265	0.156742	0.226322
TAG(46:0/FA16:0)+NH4	46	0	1.05127	0.736877	1.4998	0.78271	0.847119
TAG(46:1/FA14:0)+NH4	46	1	0.774186	0.537665	1.11475	0.168834	0.239777
TAG(46:1/FA16:0)+NH4	46	1	1.02288	0.719784	1.4536	0.899607	0.928775
TAG(46:1/FA16:1)+NH4	46	1	0.666399	0.447113	0.993234	0.0462281	0.0801659
TAG(46:1/FA18:1)+NH4	46	1	0.969805	0.673273	1.39694	0.86921	0.908242
TAG(46:2/FA14:0)+NH4	46	2	0.579546	0.390188	0.860801	0.00688084	0.0163894
TAG(46:2/FA16:0)+NH4	46	2	0.875172	0.618697	1.23797	0.451129	0.549161
TAG(46:2/FA18:1)+NH4	46	2	2.09259	1.34761	3.24942	0.00100673	0.00360397
TAG(46:2/FA18:2)+NH4	46	2	0.932458	0.657762	1.32187	0.694504	0.77523
TAG(46:3/FA18:2)+NH4	46	3	1.42154	0.964825	2.09445	0.075261	0.118885
TAG(48:0/FA14:0)+NH4	48	0	1.00362	0.703172	1.43245	0.984112	0.985742
TAG(48:0/FA16:0)+NH4	48	0	1.82926	1.21263	2.75945	0.00398853	0.0104462
TAG(48:0/FA18:0)+NH4	48	0	0.951054	0.65958	1.37133	0.788109	0.848409
TAG(48:1/FA14:0)+NH4	48	1	1.19	0.831229	1.70362	0.342003	0.435604
TAG(48:1/FA16:0)+NH4	48	1	1.37713	0.940347	2.0168	0.100179	0.151143
TAG(48:1/FA16:1)+NH4	48	1	1.55681	1.04798	2.31268	0.0283742	0.0524966
TAG(48:1/FA18:1)+NH4	48	1	1.19014	0.824411	1.71811	0.352776	0.447441
TAG(48:2/FA14:0)+NH4	48	2	0.948497	0.655604	1.37224	0.779005	0.84462
TAG(48:2/FA16:0)+NH4	48	2	0.940897	0.644972	1.3726	0.751853	0.825148
TAG(48:2/FA16:1)+NH4	48	2	0.951764	0.666404	1.35932	0.785729	0.84763
TAG(48:2/FA18:1)+NH4	48	2	1.01759	0.698695	1.48205	0.927554	0.944731
TAG(48:2/FA18:2)+NH4	48	2	0.93093	0.636365	1.36185	0.712314	0.793308
TAG(48:3/FA14:0)+NH4	48	3	0.7107	0.485482	1.0404	0.079039	0.123562
TAG(48:3/FA16:0)+NH4	48	3	0.964	0.676107	1.37448	0.83947	0.895731
TAG(48:3/FA16:1)+NH4	48	3	0.674816	0.451592	1.00838	0.054955	0.0929418
TAG(48:3/FA18:1)+NH4	48	3	0.80974	0.559081	1.17278	0.264137	0.352765
TAG(48:3/FA18:2)+NH4	48	3	0.68584	0.461365	1.01953	0.0622764	0.102384
TAG(48:4/FA18:2)+NH4	48	4	0.581915	0.389355	0.869709	0.00826977	0.0190962
TAG(49:0/FA16:0)+NH4	49	0	1.22116	0.861383	1.73121	0.261852	0.350488
TAG(49:1/FA16:0)+NH4	49	1	1.34067	0.93515	1.92203	0.11068	0.164929
TAG(49:1/FA18:1)+NH4	49	1	1.10213	0.795987	1.52601	0.558084	0.654342
TAG(49:2/FA16:0)+NH4	49	2	0.95961	0.712608	1.29223	0.785984	0.84763
TAG(49:2/FA18:2)+NH4	49	2	1.12751	0.803264	1.58264	0.487878	0.585647
TAG(50:0/FA16:0)+NH4	50	0	2.08495	1.34963	3.2209	<0.001	0.00340682
TAG(50:0/FA18:0)+NH4	50	0	1.52117	1.05013	2.20351	0.0265104	0.0493502
TAG(50:1/FA14:0)+NH4	50	1	1.16872	0.814049	1.67791	0.398132	0.493586
TAG(50:1/FA16:0)+NH4	50	1	4.74188	2.22283	10.1156	<0.001	0.00109668
TAG(50:1/FA16:1)+NH4	50	1	1.90726	1.22021	2.98115	0.0046068	0.0117106
TAG(50:1/FA18:0)+NH4	50	1	1.2889	0.88779	1.87123	0.182126	0.255274
TAG(50:1/FA18:1)+NH4	50	1	5.39278	2.38327	12.2026	<0.001	0.00109668
TAG(50:2/FA14:0)+NH4	50	2	1.3975	0.949658	2.05653	0.0895241	0.136428
TAG(50:2/FA16:0)+NH4	50	2	3.78017	1.96473	7.27311	<0.001	0.00109668
TAG(50:2/FA16:1)+NH4	50	2	2.08758	1.34019	3.25177	0.00113441	0.00385876
TAG(50:2/FA18:0)+NH4	50	2	0.962384	0.655018	1.41398	0.845146	0.897194
TAG(50:2/FA18:1)+NH4	50	2	2.09648	1.34308	3.2725	0.00112094	0.00385322
TAG(50:2/FA18:2)+NH4	50	2	3.19733	1.79055	5.70935	<0.001	0.00109668
TAG(50:3/FA14:0)+NH4	50	3	0.915149	0.6079	1.37769	0.670962	0.757852
TAG(50:3/FA16:0)+NH4	50	3	1.91013	1.25301	2.91185	0.00262577	0.00725384
TAG(50:3/FA16:1)+NH4	50	3	1.56496	1.07944	2.26887	0.0181118	0.036135
TAG(50:3/FA18:1)+NH4	50	3	1.19719	0.806013	1.77822	0.372599	0.468653
TAG(50:3/FA18:2)+NH4	50	3	1.45371	0.98279	2.15027	0.0610615	0.10066
TAG(50:3/FA18:3)+NH4	50	3	2.01345	1.26989	3.1924	0.00292081	0.00795986
TAG(50:4/FA14:0)+NH4	50	4	0.505364	0.314078	0.81315	0.00491901	0.0124
TAG(50:4/FA16:0)+NH4	50	4	1.03338	0.740589	1.44193	0.846814	0.897194
TAG(50:4/FA16:1)+NH4	50	4	0.920384	0.652074	1.2991	0.637049	0.725828
TAG(50:4/FA18:1)+NH4	50	4	0.765381	0.510175	1.14825	0.19636	0.273099
TAG(50:4/FA18:2)+NH4	50	4	0.533928	0.329239	0.865874	0.0109658	0.0238644
TAG(50:4/FA18:3)+NH4	50	4	0.842103	0.574981	1.23332	0.377373	0.472693
TAG(50:5/FA18:2)+NH4	50	5	0.694013	0.463412	1.03936	0.076296	0.120206
TAG(50:5/FA18:3)+NH4	50	5	0.508016	0.318731	0.809713	0.00440759	0.0112514
TAG(51:1/FA16:0)+NH4	51	1	1.71599	1.12179	2.62493	0.0127779	0.027399
TAG(51:1/FA17:0)+NH4	51	1	1.53545	1.03193	2.28466	0.0344311	0.0618125
TAG(51:1/FA18:1)+NH4	51	1	1.77508	1.13051	2.78716	0.0126729	0.0273143
TAG(51:2/FA16:0)+NH4	51	2	2.11577	1.34732	3.32251	0.00113531	0.00385876
TAG(51:2/FA17:0)+NH4	51	2	1.31581	0.899579	1.92463	0.157208	0.226454
TAG(51:2/FA18:1)+NH4	51	2	1.82634	1.2254	2.72198	0.00309292	0.00835365
TAG(51:2/FA18:2)+NH4	51	2	1.43066	0.989649	2.06818	0.0568284	0.0952388
TAG(51:3/FA18:2)+NH4	51	3	1.05569	0.747859	1.49023	0.75799	0.827769
TAG(51:4/FA18:2)+NH4	51	4	0.6882	0.460064	1.02947	0.0689678	0.110094
TAG(52:0/FA16:0)+NH4	52	0	1.6636	1.11291	2.48679	0.0130822	0.027771
TAG(52:0/FA18:0)+NH4	52	0	1.2945	0.896993	1.86817	0.16785	0.239502
TAG(52:1/FA16:0)+NH4	52	1	3.30745	1.81995	6.01074	<0.001	0.00109668
TAG(52:1/FA18:0)+NH4	52	1	3.03064	1.73579	5.29142	<0.001	0.00109668
TAG(52:1/FA18:1)+NH4	52	1	3.95743	1.98236	7.90033	<0.001	0.00109668
TAG(52:1/FA20:1)+NH4	52	1	1.71201	1.13647	2.57902	0.0101146	0.022415
TAG(52:2/FA16:0)+NH4	52	2	3.67993	1.91149	7.08448	<0.001	0.00109668
TAG(52:2/FA16:1)+NH4	52	2	1.90896	1.27132	2.86641	0.00182463	0.00551949
TAG(52:2/FA18:0)+NH4	52	2	2.54455	1.55658	4.1596	<0.001	0.00117866
TAG(52:2/FA18:1)+NH4	52	2	3.67014	1.92905	6.98267	<0.001	0.00109668
TAG(52:2/FA18:2)+NH4	52	2	2.48377	1.4886	4.14422	<0.001	0.00212677
TAG(52:2/FA20:2)+NH4	52	2	1.91102	1.20128	3.04008	0.0062532	0.0151327
TAG(52:3/FA16:0)+NH4	52	3	2.12454	1.33493	3.38119	0.00148072	0.0046177
TAG(52:3/FA16:1)+NH4	52	3	1.40436	0.987281	1.99762	0.0589233	0.0976674
TAG(52:3/FA18:0)+NH4	52	3	1.44268	0.991718	2.09871	0.0553042	0.0929418
TAG(52:3/FA18:1)+NH4	52	3	2.13759	1.35199	3.37967	0.00115296	0.00388954
TAG(52:3/FA18:2)+NH4	52	3	1.94713	1.26783	2.9904	0.00233458	0.00660009
TAG(52:3/FA18:3)+NH4	52	3	1.79347	1.17842	2.72952	0.00640766	0.0153835
TAG(52:3/FA20:2)+NH4	52	3	1.29779	0.907107	1.85673	0.153743	0.223592
TAG(52:3/FA20:3)+NH4	52	3	2.07583	1.33431	3.22945	0.00119939	0.00396521
TAG(52:4/FA16:0)+NH4	52	4	1.41167	0.959368	2.0772	0.0802082	0.125067
TAG(52:4/FA16:1)+NH4	52	4	1.00271	0.703296	1.42961	0.988048	0.988048
TAG(52:4/FA18:1)+NH4	52	4	1.26707	0.885314	1.81346	0.19565	0.272738
TAG(52:4/FA18:2)+NH4	52	4	1.42046	0.977901	2.06329	0.0653814	0.106333
TAG(52:4/FA18:3)+NH4	52	4	1.52196	1.02904	2.251	0.0354398	0.0634351
TAG(52:4/FA20:0)+NH4	52	4	1.30104	0.894483	1.89239	0.168622	0.239777
TAG(52:4/FA20:3)+NH4	52	4	1.24147	0.862916	1.78609	0.243818	0.32853
TAG(52:4/FA20:4)+NH4	52	4	2.2094	1.40807	3.46675	<0.001	0.00226799
TAG(52:5/FA16:0)+NH4	52	5	0.810286	0.573508	1.14482	0.232873	0.315893
TAG(52:5/FA16:1)+NH4	52	5	0.653543	0.445024	0.959766	0.0300515	0.0550944
TAG(52:5/FA18:1)+NH4	52	5	0.599769	0.395428	0.909704	0.0161628	0.0325949
TAG(52:5/FA18:2)+NH4	52	5	0.70618	0.477539	1.04429	0.0813621	0.126215
TAG(52:5/FA18:3)+NH4	52	5	0.846528	0.582105	1.23107	0.383213	0.477465
TAG(52:5/FA20:4)+NH4	52	5	1.27015	0.896874	1.79879	0.178003	0.25103
TAG(52:5/FA20:5)+NH4	52	5	0.442612	0.268979	0.728329	0.00133927	0.0043221
TAG(52:5/FA22:5)+NH4	52	5	0.75427	0.513416	1.10811	0.150749	0.220831
TAG(52:6/FA16:0)+NH4	52	6	0.542983	0.364222	0.809479	0.00272283	0.0074539
TAG(52:6/FA16:1)+NH4	52	6	0.370189	0.211117	0.649118	<0.001	0.00220122
TAG(52:6/FA18:2)+NH4	52	6	0.422032	0.253555	0.702455	<0.001	0.00335836
TAG(52:6/FA18:3)+NH4	52	6	0.397107	0.235578	0.669394	<0.001	0.00220122
TAG(52:6/FA20:4)+NH4	52	6	0.977859	0.710444	1.34593	0.890747	0.922777
TAG(52:6/FA20:5)+NH4	52	6	0.397607	0.237486	0.665688	<0.001	0.00205696
TAG(52:6/FA22:6)+NH4	52	6	0.384485	0.226971	0.651314	<0.001	0.00183416
TAG(53:0/FA16:0)+NH4	53	0	0.345511	0.191726	0.622646	<0.001	0.00192972
TAG(53:1/FA17:0)+NH4	53	1	1.43948	0.978721	2.11714	0.0642141	0.104999
TAG(53:1/FA18:0)+NH4	53	1	1.10019	0.764859	1.58254	0.606708	0.695186
TAG(53:1/FA18:1)+NH4	53	1	1.08025	0.743561	1.56938	0.685432	0.767938
TAG(53:2/FA16:0)+NH4	53	2	1.36147	0.937956	1.97623	0.104579	0.156837
TAG(53:2/FA17:0)+NH4	53	2	1.55488	1.01043	2.39268	0.0447338	0.0779941
TAG(53:2/FA18:1)+NH4	53	2	1.71292	1.14001	2.57373	0.00957667	0.0215826
TAG(53:2/FA18:2)+NH4	53	2	0.612157	0.405227	0.924758	0.0197218	0.0386138
TAG(53:3/FA16:0)+NH4	53	3	1.03822	0.74126	1.45413	0.827293	0.885863
TAG(53:3/FA17:0)+NH4	53	3	1.03489	0.720188	1.48711	0.852905	0.898968
TAG(53:3/FA18:2)+NH4	53	3	0.851834	0.584052	1.24239	0.404946	0.501006
TAG(53:4/FA17:0)+NH4	53	4	0.620783	0.399741	0.964055	0.0337568	0.0607823
TAG(53:4/FA18:2)+NH4	53	4	0.700675	0.467474	1.05021	0.0849418	0.131096
TAG(54:0/FA18:0)+NH4	54	0	1.0133	0.705035	1.45636	0.943068	0.957309
TAG(54:1/FA16:0)+NH4	54	1	1.15374	0.805234	1.65309	0.435747	0.532579
TAG(54:1/FA18:0)+NH4	54	1	2.1823	1.40082	3.39973	<0.001	0.00226799
TAG(54:1/FA18:1)+NH4	54	1	2.13472	1.37122	3.32333	<0.001	0.00297213
TAG(54:1/FA20:0)+NH4	54	1	0.905522	0.641245	1.27871	0.572993	0.670524
TAG(54:1/FA20:1)+NH4	54	1	1.7335	1.0905	2.75563	0.0200021	0.0390364
TAG(54:2/FA16:0)+NH4	54	2	1.77022	1.15048	2.72378	0.00938899	0.0212747
TAG(54:2/FA18:0)+NH4	54	2	2.636	1.57085	4.4234	<0.001	0.00138478
TAG(54:2/FA18:1)+NH4	54	2	2.47556	1.50946	4.05997	<0.001	0.00165992
TAG(54:2/FA18:2)+NH4	54	2	1.65852	1.12614	2.44258	0.0104246	0.0229342
TAG(54:2/FA20:0)+NH4	54	2	0.711337	0.487747	1.03742	0.0768715	0.120609
TAG(54:2/FA20:1)+NH4	54	2	1.98906	1.27821	3.09524	0.00230426	0.00660009
TAG(54:3/FA16:0)+NH4	54	3	1.39041	0.944921	2.04593	0.0944287	0.143181
TAG(54:3/FA18:0)+NH4	54	3	1.85527	1.22801	2.80291	0.00332922	0.00887303
TAG(54:3/FA18:1)+NH4	54	3	2.00945	1.28309	3.14702	0.00229564	0.00660009
TAG(54:3/FA18:2)+NH4	54	3	1.70759	1.13756	2.56328	0.00982721	0.021939
TAG(54:3/FA20:1)+NH4	54	3	1.2462	0.878989	1.76681	0.216546	0.296404
TAG(54:3/FA20:2)+NH4	54	3	1.56188	1.06546	2.28959	0.0223211	0.0430072
TAG(54:3/FA20:3)+NH4	54	3	1.91866	1.20877	3.04546	0.00570479	0.0139733
TAG(54:4/FA16:0)+NH4	54	4	1.45797	1.01686	2.09045	0.0402766	0.0704259
TAG(54:4/FA16:1)+NH4	54	4	0.768879	0.529716	1.11602	0.166809	0.23858
TAG(54:4/FA18:0)+NH4	54	4	1.35897	0.953886	1.93607	0.0894083	0.136428
TAG(54:4/FA18:1)+NH4	54	4	1.44239	0.994592	2.09181	0.0534372	0.0915553
TAG(54:4/FA18:2)+NH4	54	4	1.44121	0.994397	2.08879	0.0535712	0.0915553
TAG(54:4/FA18:3)+NH4	54	4	1.2283	0.842938	1.78984	0.2844	0.372428
TAG(54:4/FA20:2)+NH4	54	4	1.00824	0.700113	1.45199	0.964807	0.972847
TAG(54:4/FA20:3)+NH4	54	4	1.64637	1.1029	2.45763	0.0147226	0.0305041
TAG(54:4/FA20:4)+NH4	54	4	2.39836	1.52142	3.78075	<0.001	0.00114855
TAG(54:5/FA16:0)+NH4	54	5	2.21554	1.43653	3.41699	<0.001	0.00165992
TAG(54:5/FA16:1)+NH4	54	5	0.967853	0.696624	1.34469	0.845587	0.897194
TAG(54:5/FA18:0)+NH4	54	5	0.837382	0.579671	1.20967	0.344306	0.437616
TAG(54:5/FA18:1)+NH4	54	5	1.15962	0.809835	1.66047	0.418825	0.515018
TAG(54:5/FA18:2)+NH4	54	5	1.08619	0.755299	1.56205	0.655581	0.74414
TAG(54:5/FA18:3)+NH4	54	5	0.980551	0.66443	1.44707	0.921208	0.941985
TAG(54:5/FA20:3)+NH4	54	5	1.68275	1.11694	2.53519	0.0128164	0.027399
TAG(54:5/FA20:4)+NH4	54	5	3.76833	1.99869	7.10481	<0.001	0.00109668
TAG(54:5/FA20:5)+NH4	54	5	0.373272	0.223989	0.622048	<0.001	0.00114838
TAG(54:5/FA22:5)+NH4	54	5	1.12624	0.771678	1.64371	0.537695	0.635362
TAG(54:6/FA16:0)+NH4	54	6	0.946394	0.654153	1.36919	0.769983	0.839351
TAG(54:6/FA16:1)+NH4	54	6	0.771464	0.540944	1.10022	0.151968	0.222079
TAG(54:6/FA18:1)+NH4	54	6	0.63437	0.425007	0.946869	0.0259392	0.0484359
TAG(54:6/FA18:2)+NH4	54	6	0.925595	0.640709	1.33715	0.680375	0.765169
TAG(54:6/FA18:3)+NH4	54	6	0.677453	0.44558	1.02999	0.0684943	0.110094
TAG(54:6/FA20:3)+NH4	54	6	0.887705	0.644407	1.22286	0.466081	0.563958
TAG(54:6/FA20:4)+NH4	54	6	2.39421	1.51472	3.78438	<0.001	0.00117866
TAG(54:6/FA20:5)+NH4	54	6	0.348385	0.197126	0.615706	<0.001	0.00159277
TAG(54:6/FA22:5)+NH4	54	6	0.899712	0.637547	1.26968	0.547615	0.644566
TAG(54:6/FA22:6)+NH4	54	6	0.509987	0.32125	0.809608	0.00429491	0.0110103
TAG(54:7/FA16:1)+NH4	54	7	0.421168	0.252074	0.703691	<0.001	0.00348054
TAG(54:7/FA18:1)+NH4	54	7	0.274641	0.145137	0.519697	<0.001	0.00109668
TAG(54:7/FA18:2)+NH4	54	7	0.524336	0.339797	0.809095	0.00353286	0.00933353
TAG(54:7/FA18:3)+NH4	54	7	0.595622	0.393347	0.901915	0.0143801	0.030131
TAG(54:7/FA20:4)+NH4	54	7	1.21422	0.877042	1.68102	0.242215	0.327098
TAG(54:7/FA20:5)+NH4	54	7	0.273332	0.141106	0.529465	<0.001	0.0011112
TAG(54:7/FA22:6)+NH4	54	7	0.297797	0.159026	0.557666	<0.001	0.00114838
TAG(54:8/FA18:2)+NH4	54	8	0.373213	0.221818	0.627938	<0.001	0.00120386
TAG(54:8/FA18:3)+NH4	54	8	0.513674	0.329623	0.800496	0.00324992	0.0087
TAG(54:8/FA20:5)+NH4	54	8	0.25208	0.126436	0.502581	<0.001	0.00109668
TAG(54:8/FA22:6)+NH4	54	8	0.262826	0.136902	0.504577	<0.001	0.00109668
TAG(55:1/FA16:0)+NH4	55	1	0.208665	0.0943727	0.461376	<0.001	0.00109668
TAG(55:1/FA18:1)+NH4	55	1	0.323112	0.182578	0.571817	<0.001	0.00109668
TAG(55:2/FA18:2)+NH4	55	2	0.30732	0.168811	0.559475	<0.001	0.00109668
TAG(55:3/FA18:1)+NH4	55	3	1.09511	0.770426	1.55664	0.612588	0.700597
TAG(55:4/FA18:1)+NH4	55	4	1.17217	0.826751	1.66189	0.372479	0.468653
TAG(55:4/FA18:2)+NH4	55	4	0.773318	0.535246	1.11728	0.170916	0.242164
TAG(55:5/FA18:2)+NH4	55	5	0.983643	0.707838	1.36691	0.921744	0.941985
TAG(55:7/FA22:6)+NH4	55	7	0.368822	0.213934	0.635852	<0.001	0.00165992
TAG(56:1/FA18:1)+NH4	56	1	0.775089	0.546377	1.09954	0.15327	0.223442
TAG(56:2/FA16:0)+NH4	56	2	0.862902	0.600125	1.24074	0.426147	0.522959
TAG(56:2/FA18:0)+NH4	56	2	0.994204	0.713615	1.38512	0.972591	0.979065
TAG(56:2/FA20:0)+NH4	56	2	0.834223	0.595953	1.16776	0.29086	0.380066
TAG(56:2/FA20:1)+NH4	56	2	1.03533	0.72545	1.47759	0.848256	0.897194
TAG(56:3/FA18:0)+NH4	56	3	1.20039	0.842188	1.71095	0.312442	0.403904
TAG(56:3/FA18:1)+NH4	56	3	1.41195	0.987417	2.019	0.0586822	0.0975349
TAG(56:3/FA18:2)+NH4	56	3	0.725871	0.50316	1.04716	0.0866203	0.133347
TAG(56:3/FA20:0)+NH4	56	3	0.811327	0.571737	1.15132	0.241646	0.32706
TAG(56:3/FA20:1)+NH4	56	3	1.35544	0.955925	1.92194	0.0878275	0.134862
TAG(56:4/FA18:0)+NH4	56	4	1.48867	1.05226	2.10609	0.0245949	0.0463548
TAG(56:4/FA18:1)+NH4	56	4	1.5212	1.05238	2.19887	0.0256436	0.0480322
TAG(56:4/FA18:2)+NH4	56	4	1.01627	0.726405	1.42181	0.924937	0.943654
TAG(56:4/FA20:1)+NH4	56	4	1.11519	0.797975	1.5585	0.5232	0.621878
TAG(56:4/FA20:2)+NH4	56	4	1.70932	1.12822	2.58971	0.0114353	0.0247971
TAG(56:4/FA20:3)+NH4	56	4	1.64923	1.1003	2.47202	0.0154001	0.0315832
TAG(56:4/FA20:4)+NH4	56	4	1.78811	1.15864	2.75955	0.00866326	0.0198533
TAG(56:5/FA16:0)+NH4	56	5	2.14463	1.35088	3.40476	0.0012151	0.0039737
TAG(56:5/FA18:0)+NH4	56	5	1.5909	1.09687	2.30744	0.0143932	0.030131
TAG(56:5/FA18:1)+NH4	56	5	2.09722	1.36698	3.21756	<0.001	0.00267913
TAG(56:5/FA18:2)+NH4	56	5	1.25192	0.87494	1.79133	0.219031	0.299128
TAG(56:5/FA20:1)+NH4	56	5	1.02799	0.730785	1.44605	0.874038	0.910143
TAG(56:5/FA20:2)+NH4	56	5	1.09982	0.776561	1.55764	0.59208	0.681279
TAG(56:5/FA20:3)+NH4	56	5	1.99329	1.25432	3.16762	0.00351396	0.00932431
TAG(56:5/FA20:4)+NH4	56	5	1.99169	1.32137	3.00204	<0.001	0.00359356
TAG(56:5/FA22:4)+NH4	56	5	5.18826	2.37186	11.3489	<0.001	0.00109668
TAG(56:5/FA22:5)+NH4	56	5	0.892948	0.600548	1.32771	0.575863	0.672581
TAG(56:6/FA16:0)+NH4	56	6	1.06412	0.740261	1.52968	0.737122	0.813142
TAG(56:6/FA18:0)+NH4	56	6	0.991556	0.69528	1.41408	0.962653	0.972296
TAG(56:6/FA18:1)+NH4	56	6	1.45996	0.992193	2.14826	0.0548335	0.0929418
TAG(56:6/FA18:2)+NH4	56	6	1.48189	1.02155	2.14966	0.0382371	0.0676417
TAG(56:6/FA20:2)+NH4	56	6	1.08318	0.756156	1.55164	0.663036	0.751192
TAG(56:6/FA20:3)+NH4	56	6	1.82377	1.16316	2.85956	0.00882868	0.020156
TAG(56:6/FA20:4)+NH4	56	6	2.18593	1.39205	3.43255	<0.001	0.00264572
TAG(56:6/FA20:5)+NH4	56	6	0.353803	0.209442	0.597668	<0.001	0.00109668
TAG(56:6/FA22:4)+NH4	56	6	3.24471	1.82377	5.77273	<0.001	0.00109668
TAG(56:6/FA22:5)+NH4	56	6	1.494	0.986476	2.26263	0.0580041	0.0966734
TAG(56:6/FA22:6)+NH4	56	6	0.276941	0.140182	0.547121	<0.001	0.00127399
TAG(56:7/FA16:0)+NH4	56	7	0.398639	0.237673	0.668619	<0.001	0.00212677
TAG(56:7/FA18:0)+NH4	56	7	0.375777	0.228559	0.617821	<0.001	0.00109668
TAG(56:7/FA18:1)+NH4	56	7	0.383754	0.214891	0.685311	0.00120705	0.00396883
TAG(56:7/FA18:2)+NH4	56	7	1.02264	0.684688	1.5274	0.912907	0.936117
TAG(56:7/FA18:3)+NH4	56	7	1.04923	0.724142	1.52026	0.799494	0.859137
TAG(56:7/FA20:3)+NH4	56	7	1.10798	0.77198	1.59022	0.578082	0.673872
TAG(56:7/FA20:4)+NH4	56	7	2.27534	1.4283	3.62471	<0.001	0.00223454
TAG(56:7/FA20:5)+NH4	56	7	0.37381	0.223769	0.624456	<0.001	0.001149
TAG(56:7/FA22:5)+NH4	56	7	0.854836	0.561885	1.30052	0.463796	0.562318
TAG(56:7/FA22:6)+NH4	56	7	0.277006	0.138348	0.554629	<0.001	0.00159515
TAG(56:8/FA16:0)+NH4	56	8	0.269235	0.13991	0.518099	<0.001	0.00109668
TAG(56:8/FA16:1)+NH4	56	8	0.36109	0.212365	0.61397	<0.001	0.001149
TAG(56:8/FA18:1)+NH4	56	8	0.261719	0.12939	0.529383	<0.001	0.00117866
TAG(56:8/FA18:2)+NH4	56	8	0.396755	0.235243	0.669157	<0.001	0.00220122
TAG(56:8/FA18:3)+NH4	56	8	0.683221	0.477797	0.976965	0.0368266	0.0655297
TAG(56:8/FA20:4)+NH4	56	8	1.69318	1.14581	2.50205	0.00821449	0.0190883
TAG(56:8/FA20:5)+NH4	56	8	0.354099	0.207409	0.604537	<0.001	0.00114776
TAG(56:8/FA22:5)+NH4	56	8	0.448006	0.283335	0.70838	<0.001	0.00236003
TAG(56:8/FA22:6)+NH4	56	8	0.282826	0.149975	0.533358	<0.001	0.00109668
TAG(56:9/FA18:3)+NH4	56	9	0.477595	0.300522	0.759004	0.00176812	0.00540259
TAG(56:9/FA20:4)+NH4	56	9	1.015	0.718609	1.43363	0.93267	0.948345
TAG(56:9/FA20:5)+NH4	56	9	0.2713	0.139081	0.529214	<0.001	0.00114084
TAG(56:9/FA22:6)+NH4	56	9	0.345325	0.206885	0.576406	<0.001	0.00109668
TAG(57:2/FA18:1)+NH4	57	2	0.321247	0.172908	0.596845	<0.001	0.00165992
TAG(57:3/FA18:2)+NH4	57	3	0.473411	0.301235	0.743999	0.00118679	0.0039451
TAG(58:10/FA18:2)+NH4	58	10	0.390787	0.227798	0.670395	<0.001	0.00253175
TAG(58:10/FA20:4)+NH4	58	10	0.891387	0.585705	1.3566	0.591545	0.681279
TAG(58:10/FA22:6)+NH4	58	10	0.402713	0.245894	0.659543	<0.001	0.00161707
TAG(58:2/FA18:1)+NH4	58	2	0.840414	0.591462	1.19415	0.332043	0.424707
TAG(58:3/FA18:1)+NH4	58	3	0.837431	0.584019	1.2008	0.334629	0.427111
TAG(58:6/FA18:1)+NH4	58	6	1.26772	0.877874	1.83068	0.205784	0.284895
TAG(58:6/FA22:4)+NH4	58	6	3.56137	1.89209	6.70335	<0.001	0.00109668
TAG(58:6/FA22:5)+NH4	58	6	1.02628	0.694983	1.51551	0.896223	0.926864
TAG(58:7/FA18:0)+NH4	58	7	0.461485	0.287662	0.740343	0.00134307	0.0043221
TAG(58:7/FA18:1)+NH4	58	7	0.8459	0.588699	1.21547	0.365528	0.462645
TAG(58:7/FA18:2)+NH4	58	7	1.10925	0.763104	1.61242	0.586919	0.680241
TAG(58:7/FA22:4)+NH4	58	7	2.74703	1.55906	4.84023	<0.001	0.00211222
TAG(58:7/FA22:5)+NH4	58	7	1.05891	0.738736	1.51786	0.755342	0.826369
TAG(58:7/FA22:6)+NH4	58	7	0.286501	0.151462	0.541939	<0.001	0.0011112
TAG(58:8/FA18:1)+NH4	58	8	0.475772	0.293636	0.770882	0.00255464	0.00715532
TAG(58:8/FA18:2)+NH4	58	8	0.532627	0.333805	0.849872	0.00823479	0.0190883
TAG(58:8/FA20:4)+NH4	58	8	1.9431	1.22165	3.09062	0.0050244	0.012561
TAG(58:8/FA22:5)+NH4	58	8	1.13353	0.793775	1.61871	0.49052	0.586491
TAG(58:8/FA22:6)+NH4	58	8	0.338893	0.188322	0.609851	<0.001	0.00162674
TAG(58:9/FA18:1)+NH4	58	9	0.468899	0.298317	0.73702	0.00102912	0.00364104
TAG(58:9/FA18:2)+NH4	58	9	0.496336	0.317588	0.775689	0.00210539	0.00612385
TAG(58:9/FA20:4)+NH4	58	9	1.28219	0.866059	1.89827	0.214368	0.294208
TAG(58:9/FA22:5)+NH4	58	9	0.655672	0.439625	0.977893	0.0384924	0.0678948
TAG(58:9/FA22:6)+NH4	58	9	0.370327	0.215268	0.637075	<0.001	0.00165992
TAG(60:10/FA22:6)+NH4	60	10	0.466109	0.2913	0.74582	0.00145872	0.00457267
TAG(60:11/FA22:6)+NH4	60	11	0.264057	0.135818	0.513379	<0.001	0.00109668
TAG(60:12/FA22:6)+NH4	60	12	0.260778	0.13513	0.503259	<0.001	0.00109668
